1 **Vitamin B2 enables peroxisome proliferator-activated receptor  $\alpha$  regulation**  
2 **of fasting glucose availability**

3  
4 Peter M. Masschelin<sup>1,2,3</sup>, Pradip K. Saha<sup>1,2</sup>, Scott A. Ochsner<sup>3</sup>, Aaron R. Cox<sup>1,2</sup>, Kang Ho Kim<sup>4</sup>,  
5 Jessica B. Felix<sup>1,2,3</sup>, Robert Sharp<sup>1,2</sup>, Xin Li<sup>1,2</sup>, Lin Tan<sup>5</sup>, Jun Hyoung Park<sup>6</sup>, Liping Wang<sup>8</sup>, Vasanta  
6 Putluri<sup>3</sup>, Philip L. Lorenzi<sup>5</sup>, Alli M. Nuotio-Antar<sup>6</sup>, Zheng Sun<sup>1,2</sup>, Benny Kaiparettu<sup>7</sup>, Nagireddy  
7 Putluri<sup>3</sup>, David D. Moore<sup>3,9</sup>, Scott A. Summers<sup>8</sup>, Neil J. McKenna<sup>3</sup>, and Sean M. Hartig<sup>1,2,3\*</sup>

8  
9 <sup>1</sup>Department of Diabetes, Endocrinology, and Metabolism, Baylor College of Medicine, Houston, TX,  
10 USA

11 <sup>2</sup>Department of Medicine, Baylor College of Medicine, Houston, TX, USA

12 <sup>3</sup>Department of Molecular and Cellular Biology, Baylor College of Medicine, Houston, TX, USA

13 <sup>4</sup>Department of Anesthesiology, University of Texas Health Sciences Center, Houston, TX, USA

14 <sup>5</sup>Department of Bioinformatics and Computational Biology, The University of Texas MD Anderson  
15 Cancer Center, Houston, Texas

16 <sup>6</sup>Department of Pediatrics, Baylor College of Medicine, Houston, TX, USA

17 <sup>7</sup>Department of Molecular and Human Genetics, Baylor College of Medicine, Houston, TX, USA

18 <sup>8</sup>Department of Nutrition and Integrative Physiology, University of Utah, Salt Lake City, UT, USA

19 <sup>9</sup>Department of Nutritional Sciences and Toxicology, University of California – Berkeley, Berkeley, CA,  
20 USA

21

22 **Correspondence to:**

23 Sean M. Hartig, Department of Medicine, Baylor College of Medicine, 1 Baylor Plaza, Houston,  
24 TX, 77030, Tel: 713-798-3319, Email: [hartig@bcm.edu](mailto:hartig@bcm.edu)

25 **Abstract**

26

27 Flavin adenine dinucleotide (FAD) interacts with flavoproteins to mediate oxidation-reduction  
28 reactions required for cellular energy demands. Not surprisingly, mutations that alter FAD binding  
29 to flavoproteins cause rare inborn errors of metabolism (IEMs) that disrupt liver function and  
30 render fasting intolerance, hepatic steatosis, and lipodystrophy. In our study, depleting FAD pools  
31 in mice with a vitamin B2 deficient diet (B2D) caused phenotypes associated with organic  
32 acidemias and other IEMs, including reduced body weight, hypoglycemia, and fatty liver disease.  
33 Integrated discovery approaches revealed B2D tempered fasting activation of target genes for the  
34 nuclear receptor PPAR $\alpha$ , including those required for gluconeogenesis. Treatment with the  
35 PPAR $\alpha$  agonist fenofibrate activated the integrated stress response and refilled amino acid  
36 substrates to rescue fasting glucose availability and overcome B2D phenotypes. Overall, these  
37 findings reveal PPAR $\alpha$  governs metabolic responses to FAD availability and nominate its  
38 pharmacologic activation as strategies for organic acidemias.

39

## 40 **Introduction**

41 Flavin mononucleotide (FMN) and flavin adenine dinucleotide (FAD) serve as essential cofactors  
42 for diverse proteins that mediate oxidation-reduction (redox) reactions, transcriptional regulation,  
43 and metabolism (**Powers, 2003**). In particular, FAD supports the activity of flavoproteins that  
44 enable the electron transport chain (ETC), the tricarboxylic acid (TCA) cycle, and fatty acid  
45 oxidation (FAO). Along these lines, mutations occurring in more than 50% of human flavoproteins  
46 cause inborn errors of metabolism (IEMs) with heterogeneous clinical presentations frequently  
47 characterized by organic acidemia, fasting intolerance, and fatty liver disease (**Balasubramaniam**  
48 **et al., 2019**). Compared to the more well understood roles of nicotinamide adenine dinucleotide  
49 (NAD), the physiological relevance of FAD has remained largely ignored. This gap in knowledge  
50 slows the pursuit of therapeutic strategies to treat IEM and leaves fundamental energy balance  
51 roles for FAD unresolved.

52

53 The liver coordinates whole-body metabolism during fasting by releasing glucose and other fuels  
54 to spare the brain and survive low-nutrient conditions. Nuclear receptors sense and receive the  
55 signals of nutrient abundance in the liver to perform precise regulation of genes that ultimately  
56 maintain the energetic needs of the FAO and amino acid catabolism pathways serving  
57 gluconeogenesis (**Scholtes and Giguère, 2022**). Among nuclear receptors, peroxisome  
58 proliferator-activated receptor  $\alpha$  (PPAR $\alpha$ ) modulates fasting responses and pivots hepatocytes  
59 towards conservation and recycled substrates to sustain energy production. Synthetic  
60 PPAR $\alpha$  agonists promote FAO by directing the activity of pathways for balanced lipid metabolism  
61 in the liver, which consequently supported a series of FDA-approved fibrate drugs for the treatment  
62 of hypertriglyceridemia (**Jackevicius et al., 2011**). The lipid-lowering properties of bezafibrate

63 and fenofibrate motivated pre-clinical studies (**Steele et al., 2020; Waskowicz et al., 2019;**  
64 **Yavarow et al., 2020**) that form ongoing efforts to overcome the limited armament of therapies  
65 for IEMs.

66

67 Nutrition impacts FAD availability for the organism and dietary riboflavin (vitamin B2) supplies  
68 the backbone for all FAD and FMN synthesis. Thus, riboflavin deficiency gives rise to abnormal  
69 development and energy balance disorders. Models that expand how FAD requirements form the  
70 regulatory environment for metabolic homeostasis provide opportunities for pre-clinical  
71 experiments and studies of fundamental nutrient-sensing mechanisms. Here, we define outcomes  
72 of vitamin B2 depletion resembling IEMs of flavoprotein deficiency and transcriptional pathways  
73 that preserve glucose availability in fasted mice.

74

## 75 **Materials and methods**

### 76 **Mice and housing conditions**

77 All animal procedures were approved by the Institutional Animal Care and Use Committee of  
78 Baylor College of Medicine (AN-6411). All mice were housed in a barrier-specific pathogen-free  
79 animal facility with 12 h dark-light cycle and free access to water and food. C57BL/6J wild-type  
80 mice (RRID:IMSR\_JAX:000664) were obtained from the BCM Center for Comparative Medicine  
81 and global *Ppara*<sup>-/-</sup> mice (RRID:IMSR\_JAX:008154) were generated previously (Lee et al.,  
82 **1995**). In all experiments, male mice were randomly placed on control or riboflavin deficient diet  
83 starting at 4-weeks of age. Riboflavin-deficient and matched control diets were provided by  
84 Research Diets: 90% Control, D10012G; 90% Riboflavin-Deficient, D12030102; 99%, Control  
85 A18041301; or 99% Riboflavin-Deficient, A19080901. All diets were isocaloric, and amino acids  
86 were kept constant (**Supplemental Table S1 & S2**). All experiments adhered to ARRIVE  
87 guidelines.

### 88 **Fenofibrate gavage**

89 A 0.5% methylcellulose solution was prepared by heating 150mL water with 2.5g 400cP  
90 methylcellulose (Sigma, #M0262) added with stirring. Chilled water was added (350ml) and  
91 stirred overnight at 4°C. Fresh fenofibrate-gavage solution was made daily with 112.5mg  
92 fenofibrate (Sigma, #F6020) in 1.5mL 0.5% methylcellulose solution. Mice were gavaged daily at  
93 300mg/kg.

### 94 **Pyruvate tolerance test (PTT)**

95 To determine pyruvate tolerance, mice were fasted for 16h, and Na-pyruvate was administered  
96 (1g/kg body weight) by intraperitoneal injection. Blood glucose levels were monitored at 0, 15,  
97 30, 60, and 120 minutes by a Freestyle Glucose Monitoring System (Abbott Laboratories).

## 98 **Glucose production rate**

99 In *vivo* glucose production was performed, beginning with the insertion of a microcatheter into the  
100 jugular vein under anesthesia, followed by 4-5 days rest for complete recovery. Overnight-fasted  
101 (16h) conscious mice received a priming bolus of HPLC-purified [3-<sup>3</sup>H] glucose (10μCi) and then  
102 a constant infusion (0.1μCi/min) of labeled glucose for ~90 minutes. Blood samples were collected  
103 from the tail vein at 0, 50, 60, 75, and 90 min to calculate the basal glucose production rate from  
104 tracer dilution. Steady states were reached within one hour of infusion.

## 105 **Indirect calorimetry**

106 Wild-type mice were maintained on experimental diets and housed at room temperature in  
107 Comprehensive Lab Animal Monitoring System Home Cages (CLAMS-HC, Columbus  
108 Instruments). Oxygen consumption, CO<sub>2</sub> emission, energy expenditure, food and water intake, and  
109 activity were measured for five days (BCM Mouse Metabolic and Phenotyping Core). Mouse body  
110 composition was examined by magnetic resonance imaging (Echo Medical Systems) before  
111 indirect calorimetry.

## 112 **Histology**

113 Sections of liver tissue were frozen in Tissue-Tek OCT compound (4583; Sakura Finetek USA),  
114 and neutral lipids stained with Oil Red O. Formalin-fixed paraffin-embedded liver tissue sections  
115 were stained with hematoxylin and eosin (H/E). Images were captured on a Nikon Ci-L Brightfield  
116 microscope.

## 117 **Serum and lipid assays**

118 Fasted serum was used to measure serum lactate (K607; Biovision), ALT (TR71121; Thermo  
119 Scientific), AST (TR70121; Thermo Scientific), beta-hydroxybutyrate (Biovision K632), and  
120 serum-free fatty acids (#sfa-1; Zen-Bio).

## 121 **Liver FAD and glycogen measurements**

122 10-15 mg of liver tissue was deproteinated (K808; Biovision), followed by measurement of FAD  
123 through a colorimetric assay (K357; Biovision). FAD concentration was standardized to input  
124 tissue weight. 10-15 mg of liver tissue was used for measuring fasting hepatic glycogen (K646;  
125 Biovision).

## 126 **Hepatic TG and cholesterol**

127 Both serum and tissue samples were analyzed for triglycerides (Triglyceride reagent TR22421;  
128 Thermo Scientific) and cholesterol (Total Cholesterol Reagent TR13421; Thermo  
129 Scientific). Hepatic TGs and cholesterol were assayed as described previously (**Kim et al., 2019**).  
130 Briefly, liver homogenates were mixed with a 1:2 chloroform:methanol solution followed by  
131 isolation of the lipid-rich chloroform layer (modified Folch method).

## 132 **Immunoblotting**

133 Cell and tissue lysates were prepared in Protein Extraction Reagent (ThermoFisher) supplemented  
134 with Halt Protease and Phosphatase Inhibitor Cocktail (ThermoFisher). Western blotting was  
135 performed with whole-cell lysates run on 4-12% Bis-Tris NuPage gels (Life Technologies) and  
136 transferred onto Immobilon-P Transfer Membranes (Millipore), followed by antibody incubation.  
137 Immunoreactive bands were visualized by chemiluminescence. Antibodies used in this study are  
138 listed in **Supporting Table S5**.

## 139 **RNA extraction and RNA-seq analysis**

140 Total liver RNA was extracted using the Qiagen RNeasy Plus Mini kit (74034; Qiagen). Sample  
141 quality was confirmed on an Agilent 2100 Bioanalyzer (Agilent). mRNA library preparation and  
142 RNA sequencing were performed by Novogene. mRNA libraries were prepared with NEBNext  
143 Ultra RNA Library Prep Kit for Illumina (NEB) and size selection for libraries was performed

144 using AMPure XP system (Beckman Coulter), followed by library purity analysis. Libraries were  
145 sequenced on NovaSeq PE150 and reads mapped to the UCSC mouse reference genome mm10  
146 using STAR. FeatureCounts was used to calculate the expression level as reads per kilobase per  
147 million (RPKM). DESeq2 calculated differentially expressed genes with p values adjusted using  
148 Benjamini and Hochberg's method for controlling the False Discovery Rate (FDR). Genes with  
149 significant differential expression were determined by  $p < 0.05$ . Gene set enrichment analysis was  
150 performed with the Molecular Signatures Database, and  $-\log_{10}(p\text{-value})$  calculated for Hallmark  
151 gene sets.

### 152 **Consensome and high confidence transcriptional (HCT) target intersections**

153 Transcription factor footprint analysis and consensome enrichments were performed as previously  
154 described (Ochsner et al., 2019). For transcription factors, node and node family consensomes are  
155 gene lists ranked according to the strength of their regulatory relationship with upstream signaling  
156 pathway nodes derived from independent publicly archived transcriptomic or ChIP-Seq datasets.  
157 Genes in the 95th percentile of a given node consensome were designated high confidence  
158 transcriptional targets (HCTs) for that node and used as the input for the HCT intersection analysis  
159 using the Bioconductor GeneOverlap analysis package implemented in R. For both consensome  
160 and HCT intersection analysis, p values were adjusted for multiple testing using the method of  
161 Benjamini and Hochberg to control the FDR as implemented with the p.adjust function in R, to  
162 generate q values. Evidence for a transcriptional regulatory relationship between a node and a gene  
163 set was inferred from a larger intersection between the gene set and HCTs for a given node or node  
164 family than would be expected by chance after FDR correction ( $q < 0.05$ ). The HCT intersection  
165 analysis code has been deposited in the SPP GitHub account at [https://github.com/signaling-](https://github.com/signaling-pathways-project/ominer/)  
166 [pathways-project/ominer/](https://github.com/signaling-pathways-project/ominer/).



167 **Metabolomics**

168 Targeted measurement of hepatic carnitines, fatty acids, lipids species, CoA's, glycolysis, and  
169 TCA metabolites was carried out by the BCM Dan L Duncan Cancer Center CPRIT Cancer  
170 Proteomics and Metabolomics Core. Parallel analysis of lipids and ceramides was performed at  
171 the University of Utah. All samples were processed and analyzed as described previously  
172 (**Chaurasia et al., 2019; Kettner et al., 2016**).

173 Reagents: High-performance liquid chromatography grade and mass spectrometry grade reagents  
174 were used: acetonitrile, methanol, and water (Burdick & Jackson); formic acid, ammonium acetate,  
175 and internal standards (Sigma-Aldrich); MS grade lipid standards (Avanti Polar Lipids).

176 Internal Standards and Quality Control: To assess overall process reproducibility, mouse pooled  
177 liver or serum samples were run along with the experimental samples. A number of internal  
178 standards, including injection standards, process standards, and alignment standards, were used to  
179 assure QA/QC targets to control for experimental variability. Aliquots (200 $\mu$ L) of 10mM solutions  
180 of isotopically labeled standards were mixed and diluted up to 8000 $\mu$ L (final concentration  
181 0.25mM) and aliquoted into a final volume of 20 $\mu$ L. The aliquots were dried and stored at -80°C  
182 until further analysis. To monitor instrument performance, 20 $\mu$ L of a matrix-free mixture of the  
183 internal standards were reconstituted in 100 $\mu$ L of methanol:water (50:50) and analyzed by MRM.  
184 The metabolite extraction from the samples was monitored using pooled mouse serum or liver  
185 samples and spiked internal standards. The matrix-free internal standards and serum and liver  
186 samples were analyzed twice daily. The median coefficient of variation (CV) value for the internal  
187 standard compounds was 5%. To address overall process variability, metabolomic studies were  
188 augmented to include a set of nine experimental sample technical replicates, which were spaced  
189 evenly among the injections for each day.

190 Separation of CoAs and carnitines: Targeted profiling for CoAs and carnitines in electro spray  
191 ionization positive mode by the RP chromatographic method employed a gradient containing water  
192 (solvent A) and acetonitrile (ACN, solvent B, with both solvents containing 0.1% formic acid).  
193 Separation of metabolites was performed on a Zorbax Eclipse XDBC18 column (50 × 4.6mm i.d.;  
194 1.8µm, Agilent Technologies) maintained at 37°C. The gradient conditions were 0-6 minutes in  
195 2%B; 6.5 minutes in 30% B, 7 minutes in 90% B, 12 minutes in 95% B, followed by re-  
196 equilibration to the initial conditions.

197 Separation of glycolysis and TCA metabolites: The glycolysis and TCA metabolites were  
198 separated by the normal phase chromatography using solvents containing water (solvent A),  
199 solvent A modified by the addition of 5mM Ammonium acetate (pH 9.9), and 100% acetonitrile  
200 (solvent B). The binary pump flow rate was 0.2mL/min with a gradient spanning 80% B to 2% B  
201 over 20 minutes, 2% B to 80% B for 5 minutes, and 80% B for 13 minutes. The flow rate was  
202 gradually increased during the separation from 0.2mL/min (0-20 minutes) to 0.3mL/min (20-25  
203 minutes), and then 0.35mL/min (25-30 minutes), 0.4mL/min (30-37.99 minutes) and finally to  
204 0.2mL/min (5 minutes). Metabolites were separated on a Luna Amino (NH<sub>2</sub>) column (4µm, 100A  
205 2.1x150mm, Phenominex) maintained in a temperature-controlled chamber (37°C). All the  
206 columns used in this study were washed and reconditioned after every 50 injections.

207 Separation of fatty acids: Targeted profiling for fatty acids employed the RP chromatographic  
208 method by a gradient containing water (solvent A) with 10 mM ammonium acetate (pH 8) and  
209 100% methanol (solvent B) on a Luna Phenyyl Hexyl column (3µm, 2X150mm; Phenominex,  
210 CA) maintained at 40°C. The binary pump flow rate was 0.2 mL/min with a gradient spanning  
211 40% B to 50% B over 8 minutes, 50% B to 67% B over 5 minutes, hold 67% B for 9 minutes, 67%

212 B to 100% B over 1 minute, hold 100% B for 6 minutes, 100% B to 40% B over 1 minute and hold  
213 40% B for 7 minutes.

214 Liquid chromatography/mass spectrometry (LC/MS) analyses: The chromatographic separation of  
215 non-lipid metabolites was performed using either reverse phase separation or normal phase online  
216 with the unbiased profiling platform based on a 1290 SL Rapid resolution LC and a 6490 triple  
217 Quadrupole mass spectrometer (Agilent Technologies, Santa Clara, CA). Lipidomics required a  
218 Shimadzu CTO-20A Nexera X2 UHPLC coupled with TripleTOF 5600 equipped with a Turbo  
219 VTM ion source (AB Sciex, Concord, Canada). Using a dual electrospray ionization source, the  
220 samples were independently examined in both positive and negative ionization modes. The data  
221 acquisition during the analysis was controlled using the Mass Hunter workstation data acquisition  
222 software.

223 Lipidomics: Mouse liver lipids were extracted using a modified Bligh-Dyer method. Briefly,  
224 50 mg of crushed tissue sample from mouse whole liver was used. A 2:2:2 volume ratio of  
225 water/methanol/dichloromethane was used for lipid extract at room temperature after spiking  
226 internal standards 17:0 LPC, 17:0PC, 17:0 PE, 17:0 PG, 17:0 ceramide, 17:0 SM, 17:0PS, 17:0PA,  
227 17:0 TAG, 17:0MAG, DAG 16:0/18:1, CE 17:0. The organic layer was collected, followed by a  
228 complete drying procedure under nitrogen. Before MS analysis, the dried extract was resuspended  
229 in 100 $\mu$ L of Buffer B (10:5:85 Acetonitrile/water/Isopropyl alcohol) containing 10mM NH<sub>4</sub>OAc  
230 and subjected to reverse-phase chromatography and LC/MS. Internal standards prepared in  
231 chloroform/methanol/water (100pmol/ $\mu$ L) were LPC 17:0/0:0, PG 17:0/17:0, PE 17:0/17:0, PC  
232 17:0/17:0, TAG 17:0/17:0/17:0, SM 18:1/17:0, MAG 17:0, DAG 16:0/18:1, CE 17:0, ceramide  
233 18:1/17:0, PA 17:0, PI 17:0/20:4, and PS 17:0/17:0.

234 For lipid separation, 5mL of the lipid extract was injected into a 1.8 mm particle  $50 \times 2.1$ mm  
235 Acquity HSS UPLC T3 column (Waters). The column heater temperature was set at 55°C. For  
236 chromatographic elution, a linear gradient was used over a 20 min total run time, with 60% Solvent  
237 A (acetonitrile/water (40:60, v/v) with 10mM ammonium acetate) and 40% Solvent B  
238 (acetonitrile/water/isopropanol (10:5:85 v/v) with 10mM ammonium acetate) gradient in the first  
239 10 min. The gradient was ramped linearly to 100% Solvent B for 7 min. Then the system was  
240 switched back to 60% Solvent B and 40% Solvent A for 3 min. A 0.4mL/min flow rate was used  
241 at an injection volume of 5µL. The column was equilibrated for 3 min and run at a flow rate of  
242 0.4mL/min for a total run time of 20 min. TOF MS survey scans (150ms) and 15 MS/MS scans  
243 with a total duty cycle time of 2.4s were performed. The mass range in both modes was 50-  
244 1200m/z. The acquisition of MS/MS spectra by data-dependent acquisition (DDA) function of the  
245 Analyst TF software (AB Sciex).

246 The raw data in .mgf format was converted using proteoWizard software. The NIST MS PepSearch  
247 Program was used to search the converted files against LipidBlast libraries. The m/z width was  
248 determined via the mass accuracy of internal standards at 0.001 for positive mode and 0.005 for a  
249 negative mode at an overall mass error of less than 2 ppm. The minimum match factor at 400 was  
250 set for the downstream data processing. The MS/MS identification results from all the files were  
251 combined using an in-house software tool to create a library for quantification. The raw data files  
252 were searched against this in-house library of known lipids with mass and retention time using  
253 Multiquant 1.1.0.26 (ABsciex). The lipid species identified in the positive or negative ion modes  
254 were analyzed separately using relative abundance of peak spectra for the downstream analyses.  
255 The identified lipids were quantified by normalizing against their respective internal standard.

256 Ceramides and lipids: Lipid extracts are separated on an Acquity UPLC CSH C18 1.7 $\mu$ m 2.1 x  
257 50mm column maintained at 60°C connected to an Agilent HiP 1290 Sampler, Agilent 1290  
258 Infinity pump, equipped with an Agilent 1290 Flex Cube and Agilent 6490 triple quadrupole  
259 (QQQ) mass spectrometer. In positive ion mode, sphingolipids are detected using dynamic  
260 multiple reaction monitoring (dMRM). Source gas temperature is set to 210°C, with a N<sub>2</sub> flow of  
261 11L/min and a nebulizer pressure of 30psi. Sheath gas temperature is 400°C, sheath gas (N<sub>2</sub>) flow  
262 of 12L/min, capillary voltage is 4000V, nozzle voltage 500V, high-pressure RF 190V, and low-  
263 pressure RF is 120V. Injection volume is 2 $\mu$ L, and the samples are analyzed in a randomized order  
264 with the pooled QC sample injection eight times throughout the sample queue. Mobile phase A  
265 consists of ACN: H<sub>2</sub>O (60:40 v/v) in 10mM ammonium formate and 0.1% formic acid, and mobile  
266 phase B consists of IPA: ACN:H<sub>2</sub>O (90:9:1 v/v) in 10mM ammonium formate and 0.1% formic  
267 acid. The 5 chromatography gradient starts at 15% mobile phase B, increases to 30% B over 1 min,  
268 increases to 60% B from 1-2 min, increases to 80% B from 2-10 min, and increases to 99% B from  
269 10-10.2 min where it's held until 14 min. Post-time is 5 min, and the flow rate is 0.35 mL/min  
270 throughout. Collision energies and cell accelerator voltages were optimized using sphingolipid  
271 standards with dMRM transitions as [M+H]<sup>+</sup>→[m/z = 284.3] for dihydroceramides,  
272 [M+H]<sup>+</sup>→[m/z = 287.3] for isotope-labeled dihydroceramides, [M-H<sub>2</sub>O+H]<sup>+</sup>→[m/z = 264.2] for  
273 ceramides, [MH<sub>2</sub>O+H]<sup>+</sup>→[m/z = 267.2] for isotope-labeled ceramides and [M+H]<sup>+</sup>→[M-  
274 H<sub>2</sub>O+H]<sup>+</sup> for all targets. Sphingolipids and ceramides without available standards are identified  
275 based on HR-LC/MS, quasi-molecular ions, and characteristic product ions. Their retention times  
276 are either taken from HR-LC/MS data or inferred from the available standards. Results from LC-  
277 MS experiments are collected using Agilent Mass Hunter Workstation and analyzed using the

278 software package Agilent Mass Hunter Quant B.07.00. Ceramide and lipid species are quantitated  
279 based on peak area ratios to the standards added to the extracts.

### 280 **Analysis of FAD and FMN by IC-HRMS**

281 To determine the relative abundance of FAD and FMN in mouse liver tissue, extracts were  
282 prepared and analyzed by high-resolution mass spectrometry (HRMS). Approximately 20 to 30mg  
283 of tissue were pulverized in liquid nitrogen then homogenized with a Precellys Tissue  
284 Homogenizer. Metabolites were extracted using 80/20 (v/v) methanol/water with 0.1% ammonium  
285 hydroxide. Samples were centrifuged at 17,000xg for 5 min at 4°C, supernatants were transferred  
286 to clean tubes, followed by evaporation under vacuum. Samples were reconstituted in deionized  
287 water, then 10µL was injected into a Thermo Scientific Dionex ICS-5000+ capillary ion  
288 chromatography (IC) system containing a Thermo IonPac AS11 250×2mm 4µm column. IC flow  
289 rate was 360µL/min (at 30°C), and the gradient conditions are as follows: initial 1 mM KOH,  
290 increased to 35mM at 25 min, increased to 99mM at 39 min, and held at 99mM for 10 min. The  
291 total run time was 50min. To increase desolvation for better sensitivity, methanol was delivered  
292 by an external pump and combined with the eluent via a low dead volume mixing tee. Data were  
293 acquired using a Thermo Orbitrap Fusion Tribrid Mass Spectrometer under ESI negative mode  
294 and imported to Thermo Trace Finder software for final analysis. Relative abundance was  
295 normalized by tissue weight.

### 296 **Analysis of reduced and oxidized coenzymes by triple quadruple LC-MS**

297 To determine the relative abundance of ubiquinone (oxidized CoQ10), ubiquinol (reduced  
298 CoQ10), ubiquinone-9 (CoQ9), and ubiquinol-9 (reduced CoQ9) in mouse liver samples, extracts  
299 were prepared and analyzed by Thermo Scientific TSQ triple quadrupole mass spectrometer  
300 coupled with a Dionex UltiMate 3000 HPLC system. Approximately 20 to 30mg of tissue were

301 pulverized in liquid nitrogen then homogenized with a Precellys Tissue Homogenizer. Coenzymes  
302 were extracted with 500 $\mu$ L ice-cold 100% isopropanol. Tissue extracts were vortexed, centrifuged  
303 at 17,000xg for 5 min at 4°C, and supernatants were transferred to clean autosampler vials. The  
304 mobile phase was methanol containing 5mM ammonium formate. Separations of CoQ9, CoQ10,  
305 reduced-CoQ9, and reduced-CoQ10 were achieved on a Kinetex® 2.6 $\mu$ m C18 100 Å, 100 x  
306 4.6mm column. The flow rate was 400 $\mu$ L/min at 35°C. The mass spectrometer was operated in  
307 the MRM positive ion electrospray mode with the following transitions. CoQ10/oxidized: m/z  
308 863.7 $\rightarrow$ 197.1 CoQ10/reduced: m/z 882.7 $\rightarrow$ 197.1, CoQ9/oxidized: m/z 795.6  $\rightarrow$  197.1, and  
309 CoQ9/reduced: m/z 814.7  $\rightarrow$  197.1. Raw data files were imported to Thermo Trace Finder software  
310 for final analysis. Relative abundance was normalized by tissue weight.

### 311 **Quantification and Statistical Analysis**

312 All measurements were taken from distinct biological samples. Unless otherwise noted, all  
313 statistical analyses were performed using GraphPad Prism (version 9) and tests described in the  
314 figure legends. In the case of multiple groups, a one- or two-way ANOVA with post-hoc tests were  
315 used to determine statistical significance. When only two groups were compared, non-parametric  
316 Mann-Whitney tests were used to determine statistical significance. Gene expression and  
317 metabolomic heatmaps were plotted as Z-scores using R(4.0.3) and ComplexHeatmap(2.6.2). The  
318 species-by-species t-test was applied for metabolomics data to identify the top differentially  
319 regulated metabolites that passed the nominal threshold p values. For multiple comparisons, the  
320 Benjamini-Hochberg procedure was used for false discovery rate (FDR) correction. Statistical  
321 analysis of energy balance was performed by ANCOVA with lean body mass as a co-variate (**Mina**  
322 **et al., 2018**). No statistical method was used to predetermine sample size. Unblinded analysis of

323 histology was performed by the investigators. All data are expressed as mean  $\pm$  SEM, unless  
324 otherwise specified.



## 325 **Results**

### 326 ***Riboflavin deficiency alters body composition and energy expenditure.***

327 In mammals, diet furnishes vitamin B2 to synthesize all the FAD for electron transfer in the  
328 mitochondria and redox reactions required for cellular homeostasis (**Powers, 2003**). Amongst key  
329 metabolic organs, *ad libitum* FAD levels were highest in the liver, heart, and kidney (**Figure 1a**).  
330 To study how FAD depletion influences energy balance, we exposed male mice to vitamin B2-  
331 deficient (B2D) or control diets for four weeks and performed metabolic phenotyping (**Figure 1b**).  
332 We found 99% vitamin B2 depletion (B2D) was sufficient to reduce liver FAD levels by 70%  
333 (**Figure 1c**). Moreover, B2D significantly blunted weight gain (**Figure 1d**), and body composition  
334 measurements showed B2D also reduced fat mass (**Figure 1e**). When we examined the  
335 contribution of B2 to energy expenditure, we were surprised the stunted body weight phenotype  
336 of B2D did not arise from higher energy expenditure. B2D strongly reduced oxygen consumption  
337 (**Figure 1f**), and animals moved less during nighttime measurements (**Figure 1f**). In absolute  
338 terms, B2D-fed mice consumed the same amount of food as controls (**Figure 1f**). Reducing B2 in  
339 the diet by 90% did not impact liver FAD levels nor influence energy balance (**Supplemental**  
340 **Figure S1**). These results identify B2 requirements that make FAD available for energy  
341 expenditure requirements and body weight in male mice.

342

### 343 ***FAD is required for hepatic glucose production during fasting.***

344 Common clinical phenotypes of flavoprotein and nutritional riboflavin depletion disorders include  
345 fasting intolerance and hypoglycemia derived from impaired liver glucose production and  
346 metabolic flexibility (**Houten et al., 2016**). We found liver FAD displayed circadian accumulation  
347 (**Patel et al., 2012**) coinciding with the onset of gluconeogenesis (ZT12) that occurs before the

348 active period for mice (**Figure 2a**). We next sought to understand whether the changes in FAD  
349 that occur in the mouse liver during B2D affected gluconeogenesis. After four weeks of B2D,  
350 fasting blood glucose levels were lower (**Figure 2b**), and further plasma analysis established  
351 higher concentrations of lactate, triglycerides (TG), free fatty acids (FFAs), and ketone bodies  
352 (**Supplemental Table S3**). To determine the effects of B2D on gluconeogenesis *in vivo*, we  
353 subjected mice to a pyruvate tolerance test (PTT) after an overnight fast. Consistent with impaired  
354 gluconeogenesis from pyruvate, blood glucose concentrations were lower in B2D conditions  
355 compared with control diets at all times during the PTT (**Figure 2b**). In a liver-specific way, B2D  
356 suppressed *in vivo* hepatic glucose production inferred from dilution of <sup>3</sup>H-glucose infusions into  
357 fasted mice (**Figure 2b**). These data indicate that FAD depletion directly affects liver glucose  
358 metabolism.

359  
360 To explore molecular outcomes of riboflavin depletion, we used RNA-seq to identify biologically  
361 cohesive gene programs of B2D in the liver. Consistent with known roles of FAD in FAO,  
362 pathways related to fatty acid catabolism and lipid oxidation were strongly repressed in response  
363 to B2D (**Figure 2c**). Amongst the B2D-repressed genes annotated to the GO fatty acid catabolism  
364 pathway, we noted several encoded flavoproteins whose loss-of-function cause rare organic  
365 acidemias, including *Sqor* (**Friederich et al., 2020**) and *Ivd* (**Vockley and Ensenuer, 2006**). To  
366 further investigate the effect of B2D on flavoprotein gene expression, we curated a set of 117 genes  
367 encoding flavoproteins that require FAD or FMN for activity. Reflecting a specific impact of  
368 riboflavin deficiency, flavoprotein genes were enriched among B2D-repressed genes (**Figure 2d**)  
369 but not B2D-induced genes.

370

371 IEMs that arise from mutations in genes encoding mitochondria FAD transfer enzymes for FAO  
372 are identified by elevated organic acids in the blood, lipodystrophy, and fatty liver disease  
373 (**Balasubramaniam et al., 2019**). Lipidomics analysis in the liver identified phospholipid  
374 [phosphatidylethanolamine (PE), phosphatidylcholine (PC), and lyso-PC] and diacylglycerol (DG)  
375 as robustly attenuated (**Figure 2e**) in B2D-exposed mice compared to controls. Hepatic steatosis  
376 (**Figure 2e**) also accompanied B2D effects, presumably due to increased TG (**Supplemental**  
377 **Table S4**). Accordingly, we hypothesized that altered expression of genes in the liver of B2D  
378 relative to normal diet controls reflected non-alcoholic fatty liver disease (NAFLD). To test this  
379 hypothesis, we performed high confidence transcriptional target (HCT) intersection analysis  
380 (**Ochsner et al., 2019**) to identify signaling nodes with significant regulatory footprints amongst  
381 liver B2D-induced or -repressed genes. From this approach, we identified strong enrichment of  
382 genes induced by B2D with metabolic transcription factor knockouts that cause fatty liver disease,  
383 such as *Ppara* (**Cotter et al., 2014; Kersten et al., 1999; Montagner et al., 2016**), *Nr1h4* (**Sinal**  
384 **et al., 2000**), and *Nr0b2* (**Huang et al., 2007**).

385

386 Using other computational approaches to expand upon the underpinnings of macrosteatosis caused  
387 by B2D, we retrieved nodes previously shown to contain significant transcriptional footprints  
388 within genes differentially expressed in clinical NAFLD (**Bissig-Choisat et al., 2021**). B2D-  
389 induced genes consisted of footprints for transcription factor nodes active in NAFLD (**Figure 2f**),  
390 including HNF family members (**Xu et al., 2021**) and SREBP1 (**Shimano et al., 1997**).  
391 Collectively, our unbiased approach converged metabolic phenotypes and regulatory networks of  
392 B2D with those driving NAFLD and macrosteatosis observed in organic acidemias.

393

394 ***PPAR $\alpha$  activity maintains liver FAD pools for fasting glucose availability.***

395 Analysis of RNA-seq and ChIP-seq data (Lee et al., 2014; Oshida et al., 2015) discovered  
396 strongly enriched PPAR $\alpha$  binding near promoter regions for 43 out of 121 putative flavoproteins  
397 ( $p=1.19 \times 10^{-11}$ , hypergeometric test) and supported direct coupling of FAD availability and nuclear  
398 receptor activity in the liver. Using DNA motif analysis, we also found canonical PPAR $\alpha$  target  
399 genes among the genes downregulated by B2D (**Figure 3a**). Likewise, we identified a set of  
400 BioGRID-curated interaction partners of PPAR $\alpha$  that was enriched among nodes with strong  
401 footprints in B2D-repressed genes (**Figure 3a**). Furthermore, B2D reduced PPAR $\alpha$ -regulated  
402 flavoprotein genes (**Figure 3b**). The observation that patterns of B2D-sensitive gene expression in  
403 the liver overlap with PPAR $\alpha$  regulatory footprints indicated a convergent role for PPAR $\alpha$  and  
404 riboflavin in the transcriptional control of gluconeogenic responses.

405

406 To explore the physiological intersections between PPAR $\alpha$  and B2D, we phenotyped male *Ppara*  
407 whole-body knockout (pKO) mice exposed to control or B2D for one month (**Figure 3c**). As  
408 expected (Cotter et al., 2014), we learned pKO largely negated effects of B2D on body weight  
409 gain (**Figure 3d**). Baseline levels of FAD were considerably lower in pKO, and B2D exerted a  
410 more substantial suppression of FAD levels relative to historical wild-type measurements (**Figure**  
411 **3e**). PTT demonstrated B2D and pKO decreased the conversion of glucose release relative to  
412 control diets and wild-type controls (**Figure 3f**). These findings suggest PPAR $\alpha$  sustains FAD  
413 levels and requires riboflavin to direct glucogenic responses in the liver.

414

415

416

417 ***PPAR $\alpha$  activation by fenofibrate rescues liver glucose production even when FAD cannot be***  
418 ***generated from diet.***

419 The FDA-approved fibrate drugs act selectively on PPAR $\alpha$  to lower blood lipids and treat  
420 hypertriglyceridemia (**Bougarne et al., 2018**). PPAR $\alpha$  agonists also show promise for the  
421 treatment of some mitochondrial disorders (**Steele et al., 2020**). The convergence of B2D effects  
422 on PPAR $\alpha$  regulation of gene expression and metabolic responses suggested fenofibrate treatment  
423 may restore metabolic competency in animals on riboflavin-deficient diet. To explore this  
424 possibility, we administered fenofibrate after seven weeks of B2D exposure (**Figure 4a**). Daily  
425 gavage with fenofibrate (300 mg/kg) for two weeks while maintaining mice on diet interventions  
426 significantly reduced body weight gain under B2D conditions (**Figure 4b**). At the end of the  
427 experiment, fasted mice received fenofibrate two hours before blood glucose measurements.  
428 Fenofibrate increased blood glucose in both groups of mice far above pre-gavage levels (**Figure**  
429 **4c**). When liver histology was examined, we noticed hepatic steatosis was reversed by fenofibrate  
430 in B2D mice (**Figure 4d**). Fenofibrate also decreased hepatic TG and cholesterol in both groups  
431 relative to control treatments (**Supplemental Table S4**).

432  
433 Given the ability of PPAR $\alpha$  to regulate flavoprotein gene expression, we pursued additional RNA-  
434 seq studies to understand the mechanisms that allowed fenofibrate to rescue hypoglycemia in B2D.  
435 Consistent with restoration of the flavoprotein transcriptome in response to PPAR $\alpha$  activation, we  
436 found the number of flavoprotein genes induced by B2D+fenofibrate more than doubled when  
437 compared to B2D alone (**Figure 4e**). Given the improvement in hepatic steatosis after  
438 PPAR $\alpha$  activation, we hypothesized the B2D+fenofibrate treatment caused inversion of the  
439 alignments between B2D and NAFLD transcription networks. Using this approach, we found gene

440 footprints enriched by B2D+fenofibrate and those depleted in clinical NAFLD converged (**Figure**  
441 **4f**), including the GABP transcriptional program inactivated in inflammatory liver diseases  
442 (**Niopek et al., 2017**). These unbiased approaches strengthen the notion that PPAR $\alpha$  activation  
443 overcomes fatty liver and hypoglycemia phenotypes imposed by B2D.

444

445 *Altered sphingolipid pools and respiratory chain efficiency in B2D.*

446 Fat and protein metabolism produces substrates for the synthesis of sphingolipids, such as  
447 ceramides and dihydroceramides, whose tissue accumulation associates with severity of fatty liver  
448 disease (**Luukkonen et al., 2016**) and mitochondrial dysfunction (**Hammerschmidt et al., 2019;**  
449 **Park et al., 2016**). To determine if B2D or B2D+fenofibrate also changed the sphingolipid  
450 composition of the mouse liver, we measured a battery of sphingolipids and found that  
451 deoxysphingolipids requiring alanine condensation with palmitoyl-CoA were increased by B2D  
452 and robustly decreased by fenofibrate (**Figure 5a**). This finding may derive from the serine  
453 availability during hypoxic stress and higher NADH levels (**Yang et al., 2020**). In line with this  
454 idea, B2D conditions reduced the NAD/NADH ratio in the liver (**Figure 5b**). Notably,  
455 deoxysphingolipids impair mitochondrial function (**Alecu et al., 2017; Muthusamy et al., 2020**)  
456 and lead to an energy deficit, especially in the liver, where fasting requires elevated demand for  
457 biomass. The observed shift in deoxysphingolipid pool size supports a critical role for fenofibrate  
458 in adapting the liver to the mitochondrial stress of B2D.

459

460 Pathogenic variants in genes for riboflavin transport and metabolism that deplete FAD impair  
461 electron transfer from flavoenzymes in the ETC to coenzyme Q<sub>10</sub> and, ultimately, the energy  
462 requirements for gluconeogenesis and fasting tolerance (**Rinaldo et al., 2002**). During prolonged

463 fasting, beta-oxidation and proteolysis produce high fluxes of electrons that flow through the ETC.  
464 Coenzyme Q<sub>10</sub> collects and converges electron flow on complex III via complex II (oxidizing  
465 succinate into fumarate) or complex I. In this way, the coenzyme Q<sub>10</sub> pool accommodates variable  
466 electron fluxes and manages the mitochondria redox environment. Analysis of FAD and FMN  
467 **(Figure 5c)** confirmed fenofibrate was incapable of reconciling cofactor pools and lacked  
468 meaningful impacts on relative levels of oxidative phosphorylation proteins **(Figure 5d)**. In  
469 contrast to the reduced NAD/NADH, we found B2D treatments oxidized Coenzyme Q<sub>10</sub> and  
470 rodent-biased Coenzyme Q<sub>9</sub> **(Figure 5e)**, suggesting higher Q/QH<sub>2</sub>, more negative free energy for  
471 complexes I/II, and compensation for the defects in mitochondrial energy efficiency associated  
472 with B2D **(Satapati et al., 2015)**.

473

#### 474 *Fenofibrate activates the integrated stress response in B2D.*

475 We next measured concentrations of carnitines, amino acid, and hydrophilic metabolites in the  
476 liver using mass spectroscopy across B2D exposures. B2D altered the steady-state levels of valine,  
477 methionine, phenylalanine, and caused accumulation of short-chain C5 carnitines that reflect  
478 incomplete beta-oxidation of fatty acids **(Figure 6a)**. Upper arms of glucose metabolism  
479 (3PG/2PG) showed lower activities coupled with higher lactate and buildup of metabolites above  
480 pyruvate oxidation (G3P, PEP). Metaboanalyst **(Pang et al., 2021)** revealed complete removal of  
481 dietary riboflavin caused metabolite changes in the liver that enriched for organic acidemias and  
482 inborn errors of the TCA cycle **(Figure 6a)**. Moreover, B2D caused accumulation of oxidized  
483 TCA cycle metabolic intermediates, including fumarate, malate, and 2HG. These findings were  
484 compatible with gene sets **(Figure 6b)** associated with hypoxia and epithelial-mesenchymal  
485 transition **(Sciacovelli et al., 2016; Ward et al., 2010)**.

486

487 PPAR $\alpha$  activity favors conversion of proteins to provide amino acids as substrates for anabolic  
488 processes (**Kersten et al., 2001**). Our phenotyping analysis of fenofibrate suggested alternative  
489 carbon sources might supply the substrates to support glucose production during B2D (**Figure 4c**),  
490 including pyruvate, which recovered blood glucose in B2D to pre-gavage control levels (**Figure**  
491 **6c**). Amino acids, such as alanine and serine, are also significant contributors to de novo synthesis  
492 of glucose. In line with this idea, gluconeogenic amino acids (serine, glutamate, histidine, alanine)  
493 showed selective and unique accumulation in the combined B2D and fenofibrate treatments  
494 (**Figure 6a**). Steady-state levels of other anaplerotic amino acids that replenish the TCA cycle,  
495 isoleucine, and threonine, also increased at the expense of reduced ketosis and  $\beta$ -hydroxybutyrate  
496 (**Figure 6a** and **Supplemental Table S3**). Similarly, B2D+fenofibrate elevated levels of TCA  
497 cycle metabolites citrate and aconitate and increased the fumarate to succinate ratio. Importantly,  
498 we noted moderated levels of carnitines enriched in organic acidemias (C5 and C6). These  
499 conditions suggest PPAR $\alpha$  activation inhibits cataplerosis of TCA cycle intermediates.

500

501 The constellation of phenotypic effects resulting from riboflavin depletion and fenofibrate  
502 suggested global shifts in gene expression and metabolism. RNA-seq indicated B2D+fenofibrate  
503 precipitated a response with elements of greater amino acid and glucose metabolism (**Figure 6d**).  
504 We also observed a gene signature for the integrated stress response (ISR) further supported by  
505 increased expression of the master transcription factor regulator *Atf4*, as well as its key target genes  
506 (*Psat1*, *Fgf21*, *Asns*, *Gpt2*, *Ddit3*) during combined B2D+fenofibrate treatments. Mechanistically,  
507 ISR activation occurs through phosphorylation of eIF2 $\alpha$  and ATF4 translation, which mediates  
508 transcription of target genes to resolve the ISR and regain amino acid homeostasis (**Harding et**



509 **al., 2003; Ye et al., 2012).** In line with this idea, B2D+fenofibrate achieved robust GCN2  
510 expression, eIF2 $\alpha$  phosphorylation, and higher ATF4 levels relative to any other treatment (**Figure**  
511 **6e**). Together, our integrated transcription and mass spectrometry analyses favor a model in which  
512 PPAR $\alpha$  activation precipitates concerted activation of the ISR, which in turn overcomes the fasting  
513 intolerance imposed by B2D (**Figure 6f**).

514

515

516 **Discussion**

517 Our work sheds light on how the liver copes with severe metabolic crises and the FAO disorders  
518 caused by flavoprotein disruption or FAD depletion during prolonged fasting when both beta-  
519 oxidation and gluconeogenesis are concomitantly activated. We speculate these FAO disorders  
520 rely on conservation responses to produce energy when the mitochondria are starved of FAD and  
521 FMN required for ETC activity. Interestingly, the metabolic phenotype of B2D resists conditions  
522 unfavorable for mitochondrial function, including hypoxia, suggesting that these changes select  
523 for survival. Increased reliance upon glycolysis occurs in mitochondrial disease (**Robinson, 2006**)  
524 and hypoxia responses activate glycolytic enzymes that allow energy production when the  
525 mitochondria are starved of oxygen as a substrate for oxidative phosphorylation. Likewise, our  
526 data support the idea that the stress of B2D gives rise to an environment for PPAR $\alpha$  to co-opt the  
527 ISR, adapt to TCA cycle dysfunction, and engage hypoxia enzymes to reconcile anaplerosis.  
528 Elevated TCA cycle intermediates, such as fumarate, then act to stabilize antioxidant transcription  
529 factors and protect against oxidative stress in the liver (**Ashrafian et al., 2012**) during the stress  
530 of IEMs modeled in our study.

531

532 Mammals cannot synthesize vitamin B2, so diet remains the only available source of FAD and  
533 FMN (**Powers, 2003**). While the effect of B2D may act through different pathways and tissues,  
534 we demonstrated some of these effects may be mediated through disturbance of nuclear receptor  
535 activity and altered glucose availability. One important caveat of these experiments is that the  
536 kidney also contributes to glucose production during fasting (**Joseph et al., 2000**). While our *in-*  
537 *vivo* experiments do not explore whether the kidney reconciled any liver gluconeogenic deficiency,

538 our observations reveal fundamental vitamin requirements to source the liver with the FAD and  
539 FMN pools necessary for energy balance.

540

541 The energetic requirements of fasting dictate substrate oxidation and electron transport. B2D  
542 restricts mitochondrial function, which causes reductive pressures that exacerbate ROS formation  
543 in part through proton leak. PPAR $\alpha$  activation prevents oxidative stress (**Ip et al., 2004**) by  
544 merging lower NAD/NADH and oxidized Q, which, in turn, lowers the free energy of electron  
545 transport through complexes I and II. These data are consistent with inhibition of complex II,  
546 resulting in a more oxidized Q pool and reveals an important adaptation that allows the liver to  
547 overcome riboflavin deficiency (**Treberg et al., 2011**).

548

549 IEMs modeled in our study frequently present NAFLD-like phenotypes that contribute to fasting  
550 intolerance (**Rinaldo et al., 2002**). In our model, B2D alters lipid profiles and gene expression  
551 patterns that converge B2D with more common NAFLD phenotypes. The liver dominates mass-  
552 specific metabolic rates (**Rolfe and Brown, 1997**) and, for this reason, the NAFLD caused by B2D  
553 likely reflects a combination of lower hepatic fatty acid oxidation contributing to the accumulation  
554 of liver triglycerides and other complex lipid species observed in obesity (**Moore et al., 2022**).  
555 Our lipidomics also revealed that B2D caused accumulation of deoxysphingolipids, which also  
556 become more abundant in NAFLD from incomplete fat oxidation and accrual of toxic  
557 intermediates (**Gai et al., 2020**). These findings are particularly relevant for discovering new  
558 biomarkers for fatty liver disease.

559

560 Inefficient amino acid availability, or increased requirements of amino acids to maintain  
561 gluconeogenesis, activate ATF4 and the ISR. ATF4 is the principal downstream effector of the  
562 ISR, whose regulation becomes altered in human and rodent NAFLD (**Puri et al., 2008; Seo et**  
563 **al., 2009**). Integrated metabolomic and RNA-seq studies demonstrated that fenofibrate unveils the  
564 ISR to increase the abundance of anaplerotic amino acids. We are unaware of other studies that  
565 observe coincident activation of PPAR $\alpha$  and ATF4 to drive adaptive responses to liver stress.  
566 However, induction of shared PPAR $\alpha$  and ATF4 targets, including *Fgf21*, may contribute to  
567 hepatoprotection from lipotoxic lipid accumulation (**Montagner et al., 2016**). It will be interesting  
568 in the future to determine why B2D exposes a vulnerability to fenofibrate that engages selective  
569 genome regulation by PPAR $\alpha$  and ATF4 for recovering glucose production in settings of fasting  
570 intolerance.

571

572 This study is unique in its comprehensive approach to understand the complex metabolic  
573 consequences of FAD depletion and riboflavin auxotrophy in mouse models. While further studies  
574 are needed, we describe allostatic outcomes of PPAR $\alpha$  activation that overcome bioenergetic costs  
575 of fasting. Rare diseases of flavoprotein mutations, including organic acidemias, cause substantial  
576 morbidity and have no cure. Therefore, understanding how nuclear receptor regulation of  
577 flavoprotein function and FAD pool distribution surmounts hypoglycemia and fatty liver is  
578 valuable for implementing metabolic interventions and future therapeutic strategies.

579

580 **Acknowledgements**

581 This work was funded by the Nancy Chang, Ph.D. Award for Research Excellence at Baylor  
582 College of Medicine, American Diabetes Association #1-18-IBS-105 and NIH R01DK114356  
583 (to SMH).

584

585 **Competing interests**

586 Scott Summers is a co-founder and shareholder of Centaurus Therapeutics. There are no competing  
587 interests otherwise related to this article.

588

589 **Author contributions**

590 PMM and SMH conceptualized the study. PMM, ARC, PKS, and SMH designed experiments.  
591 PMM, NJM, and SMH wrote the manuscript with editorial input from all authors. PMM performed  
592 all experiments with assistance as noted: PKS, KHK, RS, JBF, XL, ANA, and ARC assisted with  
593 mouse phenotyping; JHP and BK helped interpret ETC function; VP, NP, LT, PLL, LW, and SAS  
594 provided metabolomics analysis and support; SO and NJM assisted with RNA-seq analysis and  
595 data integration. S.M.H. is the guarantor of this work and, as such, had full access to all the data  
596 in the study and takes responsibility for the integrity of the data.

597

598 **Materials Availability**

599 This study did not generate new unique reagents. The authors declare that reagents utilized are  
600 available upon reasonable request to the corresponding author.

601

602

603 **Data Availability**

604 All data generated or analyzed during this study are included in the published article and  
605 supplemental files. RNA-sequencing datasets generated have been deposited into the National  
606 Center for Biotechnology Gene Expression Omnibus database. The accession numbers for these  
607 datasets are NCBI GEO: GSE206200.

608

609

610 **References**

611 Alecu, I., Tedeschi, A., Behler, N., Wunderling, K., Lamberz, C., Lauterbach, M.A., Gaebler, A.,  
612 Ernst, D., Van Veldhoven, P.P., Al-Amoudi, A., et al. (2017). Localization of 1-  
613 deoxysphingolipids to mitochondria induces mitochondrial dysfunction. *J Lipid Res* **58**, 42-59.  
614 10.1194/jlr.M068676

615

616 Ashrafian, H., Czibik, G., Bellahcene, M., Aksentijević, D., Smith, A.C., Mitchell, S.J., Dodd,  
617 M.S., Kirwan, J., Byrne, J.J., Ludwig, C., et al. (2012). Fumarate is cardioprotective via  
618 activation of the Nrf2 antioxidant pathway. *Cell Metab* **15**, 361-371. 10.1016/j.cmet.2012.01.017

619

620 Balasubramaniam, S., Christodoulou, J., and Rahman, S. (2019). Disorders of riboflavin  
621 metabolism. *J Inherit Metab Dis* **42**, 608-619. 10.1002/jimd.12058

622

623 Bissig-Choisat, B., Alves-Bezerra, M., Zorman, B., Ochsner, S.A., Barzi, M., Legras, X., Yang,  
624 D., Borowiak, M., Dean, A.M., York, R.B., et al. (2021). A human liver chimeric mouse model  
625 for non-alcoholic fatty liver disease. *JHEP Rep* **3**, 100281. 10.1016/j.jhepr.2021.100281

626

627 Bougarne, N., Weyers, B., Desmet, S.J., Deckers, J., Ray, D.W., Staels, B., and De Bosscher, K.  
628 (2018). Molecular actions of PPAR $\alpha$  in lipid metabolism and inflammation. *Endocr Rev* **39**, 760-  
629 802. 10.1210/er.2018-00064

630

631 Chaurasia, B., Tippetts, T.S., Mayoral Monibas, R., Liu, J., Li, Y., Wang, L., Wilkerson, J.L.,  
632 Sweeney, C.R., Pereira, R.F., Sumida, D.H., et al. (2019). Targeting a ceramide double bond  
633 improves insulin resistance and hepatic steatosis. *Science* **365**, 386-392.  
634 10.1126/science.aav3722

635

636 Cotter, D.G., Ercal, B., d'Avignon, D.A., Dietzen, D.J., and Crawford, P.A. (2014). Impairments  
637 of hepatic gluconeogenesis and ketogenesis in PPAR $\alpha$ -deficient neonatal mice. *Am J Physiol*  
638 *Endocrinol Metab* **307**, E176-185. 10.1152/ajpendo.00087.2014

639

- 640 Friederich, M.W., Elias, A.F., Kuster, A., Laugwitz, L., Larson, A.A., Landry, A.P., Ellwood-  
641 Digel, L., Mirsky, D.M., Dimmock, D., Haven, J., et al. (2020). Pathogenic variants in SQOR  
642 encoding sulfide:quinone oxidoreductase are a potentially treatable cause of Leigh disease. *J*  
643 *Inherit Metab Dis* **43**, 1024-1036. 10.1002/jimd.12232
- 644  
645 Gai, Z., Gui, T., Alecu, I., Lone, M.A., Hornemann, T., Chen, Q., Visentin, M., Hiller, C.,  
646 Hausler, S., and Kullak-Ublick, G.A. (2020). Farnesoid X receptor activation induces the  
647 degradation of hepatotoxic 1-deoxysphingolipids in non-alcoholic fatty liver disease. *Liver Int*  
648 **40**, 844-859. 10.1111/liv.14340
- 649  
650 Hammerschmidt, P., Ostkotte, D., Nolte, H., Gerl, M.J., Jais, A., Brunner, H.L., Sprenger, H.G.,  
651 Awazawa, M., Nicholls, H.T., Turpin-Nolan, S.M., et al. (2019). CerS6-derived sphingolipids  
652 interact with Mff and promote mitochondrial fragmentation in obesity. *Cell* **177**, 1536-  
653 1552.e1523. 10.1016/j.cell.2019.05.008
- 654  
655 Harding, H.P., Zhang, Y., Zeng, H., Novoa, I., Lu, P.D., Calfon, M., Sadri, N., Yun, C., Popko,  
656 B., Paules, R., et al. (2003). An integrated stress response regulates amino acid metabolism and  
657 resistance to oxidative stress. *Mol Cell* **11**, 619-633. 10.1016/s1097-2765(03)00105-9
- 658  
659 Houten, S.M., Violante, S., Ventura, F.V., and Wanders, R.J. (2016). The biochemistry and  
660 physiology of mitochondrial fatty acid  $\beta$ -oxidation and its genetic disorders. *Annu Rev Physiol*  
661 **78**, 23-44. 10.1146/annurev-physiol-021115-105045
- 662  
663 Huang, J., Iqbal, J., Saha, P.K., Liu, J., Chan, L., Hussain, M.M., Moore, D.D., and Wang, L.  
664 (2007). Molecular characterization of the role of orphan receptor small heterodimer partner in  
665 development of fatty liver. *Hepatology* **46**, 147-157. 10.1002/hep.21632
- 666  
667 Ip, E., Farrell, G., Hall, P., Robertson, G., and Leclercq, I. (2004). Administration of the potent  
668 PPARalpha agonist, Wy-14,643, reverses nutritional fibrosis and steatohepatitis in mice.  
669 *Hepatology* **39**, 1286-1296. 10.1002/hep.20170
- 670  
671 Jackevicius, C.A., Tu, J.V., Ross, J.S., Ko, D.T., Carreon, D., and Krumholz, H.M. (2011). Use  
672 of fibrates in the United States and Canada. *Jama* **305**, 1217-1224. 10.1001/jama.2011.353
- 673  
674 Joseph, S.E., Heaton, N., Potter, D., Pernet, A., Umpleby, M.A., and Amiel, S.A. (2000). Renal  
675 glucose production compensates for the liver during the anhepatic phase of liver transplantation.  
676 *Diabetes* **49**, 450-456. 10.2337/diabetes.49.3.450
- 677  
678 Kersten, S., Mandard, S., Escher, P., Gonzalez, F.J., Tafuri, S., Desvergne, B., and Wahli, W.  
679 (2001). The peroxisome proliferator-activated receptor alpha regulates amino acid metabolism.  
680 *Faseb j* **15**, 1971-1978. 10.1096/fj.01-0147com
- 681  
682 Kersten, S., Seydoux, J., Peters, J.M., Gonzalez, F.J., Desvergne, B., and Wahli, W. (1999).  
683 Peroxisome proliferator-activated receptor alpha mediates the adaptive response to fasting. *J Clin*  
684 *Invest* **103**, 1489-1498. 10.1172/jci6223
- 685

- 686 Kettner, N.M., Voicu, H., Finegold, M.J., Coarfa, C., Sreekumar, A., Putluri, N., Katchy, C.A.,  
687 Lee, C., Moore, D.D., and Fu, L. (2016). Circadian homeostasis of liver metabolism suppresses  
688 hepatocarcinogenesis. *Cancer Cell* **30**, 909-924. 10.1016/j.ccell.2016.10.007  
689
- 690 Kim, K.H., Choi, J.M., Li, F., Dong, B., Wooton-Kee, C.R., Arizpe, A., Anakk, S., Jung, S.Y.,  
691 Hartig, S.M., and Moore, D.D. (2019). Constitutive androstane receptor differentially regulates  
692 bile acid homeostasis in mouse models of intrahepatic cholestasis. *Hepatol Commun* **3**, 147-159.  
693 10.1002/hep4.1274  
694
- 695 Lee, J.M., Wagner, M., Xiao, R., Kim, K.H., Feng, D., Lazar, M.A., and Moore, D.D. (2014).  
696 Nutrient-sensing nuclear receptors coordinate autophagy. *Nature* **516**, 112-115.  
697 10.1038/nature13961  
698  
699
- 700 Lee, S.S., Pineau, T., Drago, J., Lee, E.J., Owens, J.W., Kroetz, D.L., Fernandez-Salguero, P.M.,  
701 Westphal, H., and Gonzalez, F.J. (1995). Targeted disruption of the alpha isoform of the  
702 peroxisome proliferator-activated receptor gene in mice results in abolishment of the pleiotropic  
703 effects of peroxisome proliferators. *Mol Cell Biol* **15**, 3012-3022. 10.1128/mcb.15.6.3012  
704
- 705 Luukkonen, P.K., Zhou, Y., Sädevirta, S., Leivonen, M., Arola, J., Orešič, M., Hyötyläinen, T.,  
706 and Yki-Järvinen, H. (2016). Hepatic ceramides dissociate steatosis and insulin resistance in  
707 patients with non-alcoholic fatty liver disease. *J Hepatol* **64**, 1167-1175.  
708 10.1016/j.jhep.2016.01.002  
709
- 710 Mina, A.I., LeClair, R.A., LeClair, K.B., Cohen, D.E., Lantier, L., and Banks, A.S. (2018). CalR:  
711 A web-based analysis tool for indirect calorimetry experiments. *Cell Metab* **28**, 656-666.e651.  
712 10.1016/j.cmet.2018.06.019  
713
- 714 Montagner, A., Polizzi, A., Fouché, E., Ducheix, S., Lippi, Y., Lasserre, F., Barquissau, V.,  
715 Régnier, M., Lukowicz, C., Benhamed, F., et al. (2016). Liver PPAR $\alpha$  is crucial for whole-body  
716 fatty acid homeostasis and is protective against NAFLD. *Gut* **65**, 1202-1214. 10.1136/gutjnl-  
717 2015-310798  
718
- 719 Moore, M.P., Cunningham, R.P., Meers, G.M., Johnson, S.A., Wheeler, A.A., Ganga, R.R.,  
720 Spencer, N.M., Pitt, J.B., Diaz-Arias, A., Swi, A.I.A., et al. (2022). Compromised hepatic  
721 mitochondrial fatty acid oxidation and reduced markers of mitochondrial turnover in human  
722 NAFLD. *Hepatology*. 10.1002/hep.32324  
723
- 724 Muthusamy, T., Cordes, T., Handzlik, M.K., You, L., Lim, E.W., Gengatharan, J., Pinto, A.F.M.,  
725 Badur, M.G., Kolar, M.J., Wallace, M., et al. (2020). Serine restriction alters sphingolipid  
726 diversity to constrain tumour growth. *Nature* **586**, 790-795. 10.1038/s41586-020-2609-x  
727
- 728 Niopek, K., Üstünel, B.E., Seitz, S., Sakurai, M., Zota, A., Mattijssen, F., Wang, X., Sijmonsma,  
729 T., Feuchter, Y., Gail, A.M., et al. (2017). A hepatic GAbp-AMPK axis links inflammatory  
730 signaling to systemic vascular damage. *Cell Rep* **20**, 1422-1434. 10.1016/j.celrep.2017.07.023  
731



- 732 Ochsner, S.A., Abraham, D., Martin, K., Ding, W., McOwiti, A., Kankanamge, W., Wang, Z.,  
733 Andreano, K., Hamilton, R.A., Chen, Y., et al. (2019). The signaling pathways project, an  
734 integrated 'omics knowledgebase for mammalian cellular signaling pathways. *Sci Data* **6**, 252.  
735 10.1038/s41597-019-0193-4
- 736
- 737 Oshida, K., Vasani, N., Thomas, R.S., Applegate, D., Rosen, M., Abbott, B., Lau, C., Guo, G.,  
738 Aleksunes, L.M., Klaassen, C., et al. (2015). Identification of modulators of the nuclear receptor  
739 peroxisome proliferator-activated receptor  $\alpha$  (PPAR $\alpha$ ) in a mouse liver gene expression  
740 compendium. *PLoS One* **10**, e0112655. 10.1371/journal.pone.0112655
- 741
- 742 Pang, Z., Chong, J., Zhou, G., de Lima Morais, D.A., Chang, L., Barrette, M., Gauthier, C.,  
743 Jacques, P., Li, S., and Xia, J. (2021). MetaboAnalyst 5.0: narrowing the gap between raw  
744 spectra and functional insights. *Nucleic Acids Res* **49**, W388-w396. 10.1093/nar/gkab382
- 745
- 746 Park, M., Kaddai, V., Ching, J., Fridianto, K.T., Sieli, R.J., Sugii, S., and Summers, S.A. (2016).  
747 A role for ceramides, but not sphingomyelins, as antagonists of insulin signaling and  
748 mitochondrial metabolism in C2C12 myotubes. *J Biol Chem* **291**, 23978-23988.  
749 10.1074/jbc.M116.737684
- 750
- 751 Patel, V.R., Eckel-Mahan, K., Sassone-Corsi, P., and Baldi, P. (2012). CircadiOmics: integrating  
752 circadian genomics, transcriptomics, proteomics and metabolomics. *Nat Methods* **9**, 772-773.  
753 10.1038/nmeth.2111
- 754
- 755 Powers, H.J. (2003). Riboflavin (vitamin B-2) and health. *Am J Clin Nutr* **77**, 1352-1360.  
756 10.1093/ajcn/77.6.1352
- 757
- 758 Puri, P., Mirshahi, F., Cheung, O., Natarajan, R., Maher, J.W., Kellum, J.M., and Sanyal, A.J.  
759 (2008). Activation and dysregulation of the unfolded protein response in nonalcoholic fatty liver  
760 disease. *Gastroenterology* **134**, 568-576. 10.1053/j.gastro.2007.10.039
- 761
- 762 Rinaldo, P., Matern, D., and Bennett, M.J. (2002). Fatty acid oxidation disorders. *Annu Rev*  
763 *Physiol* **64**, 477-502. 10.1146/annurev.physiol.64.082201.154705
- 764
- 765 Robinson, B.H. (2006). Lactic acidemia and mitochondrial disease. *Mol Genet Metab* **89**, 3-13.  
766 10.1016/j.ymgme.2006.05.015
- 767
- 768 Rolfe, D.F., and Brown, G.C. (1997). Cellular energy utilization and molecular origin of  
769 standard metabolic rate in mammals. *Physiol Rev* **77**, 731-758. 10.1152/physrev.1997.77.3.731
- 770
- 771 Satapati, S., Kucejova, B., Duarte, J.A., Fletcher, J.A., Reynolds, L., Sunny, N.E., He, T., Nair,  
772 L.A., Livingston, K.A., Fu, X., et al. (2015). Mitochondrial metabolism mediates oxidative stress  
773 and inflammation in fatty liver. *J Clin Invest* **125**, 4447-4462. 10.1172/jci82204
- 774
- 775 Scholtes, C., and Giguère, V. (2022). Transcriptional control of energy metabolism by nuclear  
776 receptors. *Nat Rev Mol Cell Biol*. 10.1038/s41580-022-00486-7
- 777

- 778 Sciacovelli, M., Gonçalves, E., Johnson, T.I., Zecchini, V.R., da Costa, A.S., Gaude, E.,  
779 Drubbel, A.V., Theobald, S.J., Abbo, S.R., Tran, M.G., et al. (2016). Fumarate is an epigenetic  
780 modifier that elicits epithelial-to-mesenchymal transition. *Nature* **537**, 544-547.  
781 [10.1038/nature19353](https://doi.org/10.1038/nature19353)
- 782
- 783 Seo, J., Fortunato, E.S., 3rd, Suh, J.M., Stenesen, D., Tang, W., Parks, E.J., Adams, C.M., Townes,  
784 T., and Graff, J.M. (2009). Atf4 regulates obesity, glucose homeostasis, and energy expenditure.  
785 *Diabetes* **58**, 2565-2573. [10.2337/db09-0335](https://doi.org/10.2337/db09-0335)
- 786
- 787 Shimano, H., Horton, J.D., Shimomura, I., Hammer, R.E., Brown, M.S., and Goldstein, J.L.  
788 (1997). Isoform 1c of sterol regulatory element binding protein is less active than isoform 1a in  
789 livers of transgenic mice and in cultured cells. *J Clin Invest* **99**, 846-854. [10.1172/jci119248](https://doi.org/10.1172/jci119248)
- 790
- 791 Sinal, C.J., Tohkin, M., Miyata, M., Ward, J.M., Lambert, G., and Gonzalez, F.J. (2000).  
792 Targeted disruption of the nuclear receptor FXR/BAR impairs bile acid and lipid homeostasis.  
793 *Cell* **102**, 731-744. [10.1016/s0092-8674\(00\)00062-3](https://doi.org/10.1016/s0092-8674(00)00062-3)
- 794
- 795 Steele, H., Gomez-Duran, A., Pyle, A., Hopton, S., Newman, J., Stefanetti, R.J., Charman, S.J.,  
796 Parikh, J.D., He, L., Viscomi, C., et al. (2020). Metabolic effects of bezafibrate in mitochondrial  
797 disease. *EMBO Mol Med* **12**, e11589. [10.15252/emmm.201911589](https://doi.org/10.15252/emmm.201911589)
- 798
- 799 Treberg, J.R., Quinlan, C.L., and Brand, M.D. (2011). Evidence for two sites of superoxide  
800 production by mitochondrial NADH-ubiquinone oxidoreductase (complex I). *J Biol Chem* **286**,  
801 27103-27110. [10.1074/jbc.M111.252502](https://doi.org/10.1074/jbc.M111.252502)
- 802
- 803 Vockley, J., and Ensenauer, R. (2006). Isovaleric acidemia: new aspects of genetic and  
804 phenotypic heterogeneity. *Am J Med Genet C Semin Med Genet* **142c**, 95-103.  
805 [10.1002/ajmg.c.30089](https://doi.org/10.1002/ajmg.c.30089)
- 806
- 807 Ward, P.S., Patel, J., Wise, D.R., Abdel-Wahab, O., Bennett, B.D., Collier, H.A., Cross, J.R.,  
808 Fantin, V.R., Hedvat, C.V., Perl, A.E., et al. (2010). The common feature of leukemia-associated  
809 IDH1 and IDH2 mutations is a neomorphic enzyme activity converting alpha-ketoglutarate to 2-  
810 hydroxyglutarate. *Cancer Cell* **17**, 225-234. [10.1016/j.ccr.2010.01.020](https://doi.org/10.1016/j.ccr.2010.01.020)
- 811
- 812 Waskowicz, L.R., Zhou, J., Landau, D.J., Brooks, E.D., Lim, A., Yavarow, Z.A., Kudo, T.,  
813 Zhang, H., Wu, Y., Grant, S., et al. (2019). Bezafibrate induces autophagy and improves hepatic  
814 lipid metabolism in glycogen storage disease type Ia. *Hum Mol Genet* **28**, 143-154.  
815 [10.1093/hmg/ddy343](https://doi.org/10.1093/hmg/ddy343)
- 816
- 817 Xu, Y., Zhu, Y., Hu, S., Xu, Y., Stroup, D., Pan, X., Bawa, F.C., Chen, S., Gopoju, R., Yin, L.,  
818 et al. (2021). Hepatocyte nuclear factor 4α prevents the steatosis-to-NASH progression by  
819 regulating p53 and bile acid signaling (in mice). *Hepatology* **73**, 2251-2265. [10.1002/hep.31604](https://doi.org/10.1002/hep.31604)
- 820
- 821 Yang, L., Garcia Canaveras, J.C., Chen, Z., Wang, L., Liang, L., Jang, C., Mayr, J.A., Zhang, Z.,  
822 Ghergurovich, J.M., Zhan, L., et al. (2020). Serine catabolism feeds NADH when respiration is  
823 impaired. *Cell Metab* **31**, 809-821.e806. [10.1016/j.cmet.2020.02.017](https://doi.org/10.1016/j.cmet.2020.02.017)

824  
825  
826  
827  
828  
829  
830  
831  
832  
833  
  
834  
  
835

Yavarow, Z.A., Kang, H.R., Waskowicz, L.R., Bay, B.H., Young, S.P., Yen, P.M., and Koeberl, D.D. (2020). Fenofibrate rapidly decreases hepatic lipid and glycogen storage in neonatal mice with glycogen storage disease type Ia. *Hum Mol Genet* **29**, 286-294. 10.1093/hmg/ddz290

Ye, J., Mancuso, A., Tong, X., Ward, P.S., Fan, J., Rabinowitz, J.D., and Thompson, C.B. (2012). Pyruvate kinase M2 promotes de novo serine synthesis to sustain mTORC1 activity and cell proliferation. *Proc Natl Acad Sci U S A* **109**, 6904-6909. 10.1073/pnas.1204176109

836 **Figures and Figure Legends**

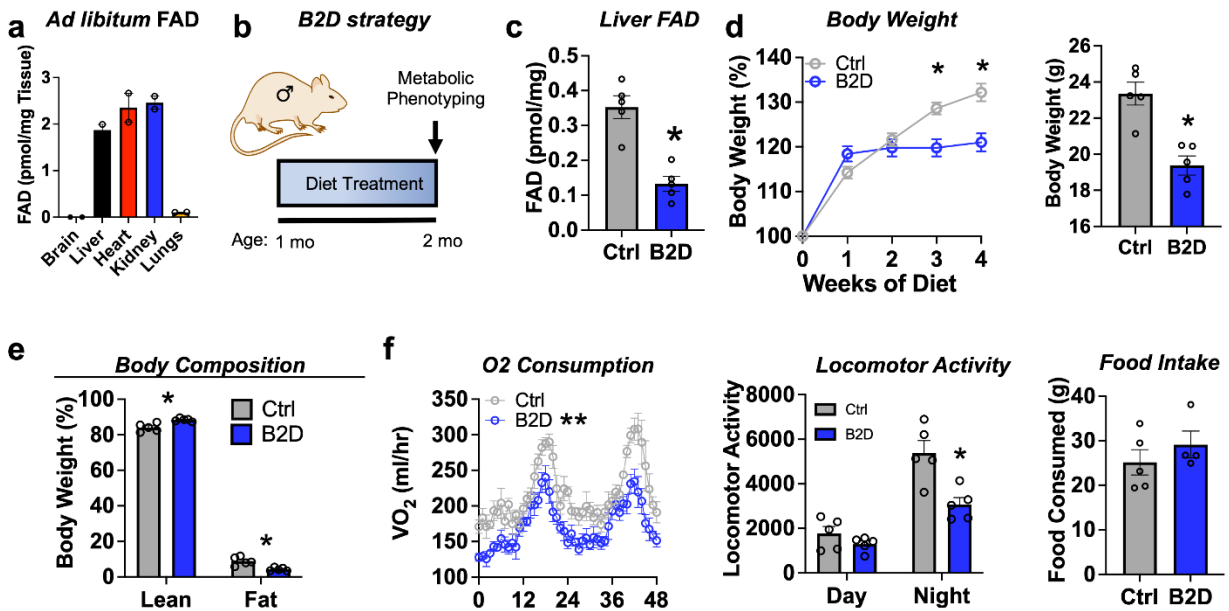

837  
838 **Figure 1: Riboflavin deficiency alters body composition and energy expenditure.**  
839 **(a)** *Ad libitum* FAD concentrations measured from male WT mice. **(b)** One-month old male mice  
840 (n=4-5 per group) were exposed to 99% B2D or isocaloric control diet (Ctrl) for one month,  
841 followed by metabolic phenotyping. **(c)** FAD concentrations in the fasted liver. **(d)** Body weight  
842 (left - % initial; right – body weight at necropsy) and **(e)** body composition (% of body mass). **(f)**  
843 Mice were individually housed and monitored in CLAMS-HC. Recorded traces of oxygen  
844 consumption (VO<sub>2</sub>), locomotor activity, and cumulative food intake during time in the metabolic  
845 cages. Mann-Whitney test for liver FAD levels, body weight, and body composition (**c, d, e**). 2-  
846 way ANOVA with Sidak multiple comparison test for body weight gain (**d**). Statistical analysis  
847 CLAMS data was performed by ANCOVA with lean body mass as a co-variate (**f**). Data are  
848 represented as mean +/- SEM. \*p<0.05, \*\*p<0.02.

850

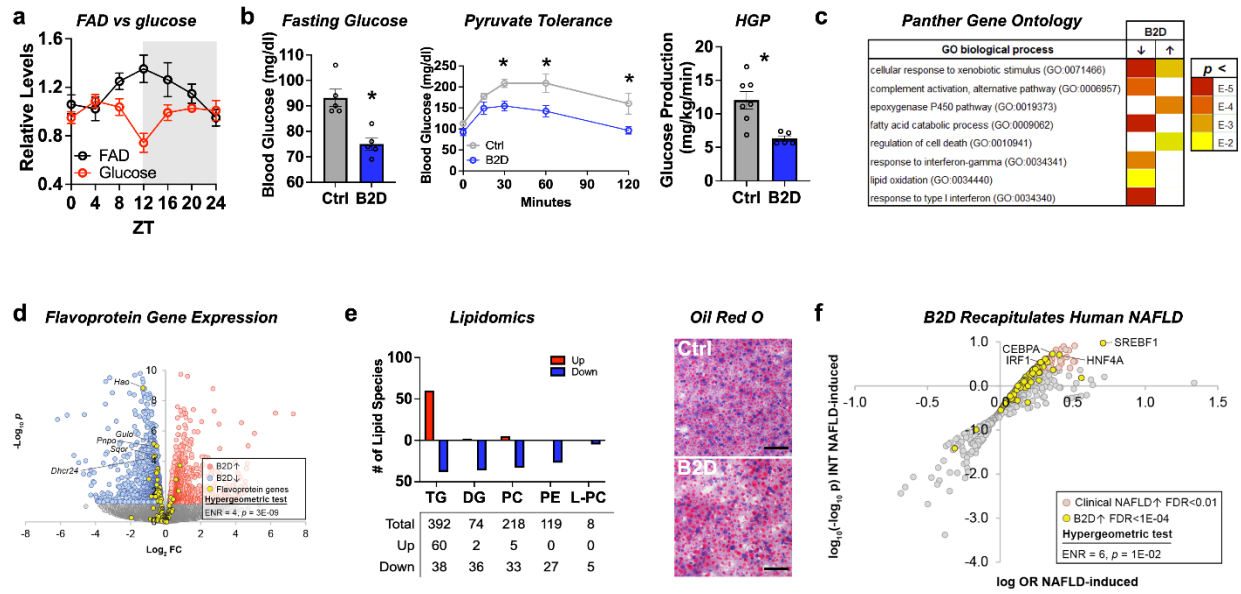

851  
852  
853  
854  
855  
856  
857  
858  
859  
860  
861  
862  
863  
864  
865  
866  
867

**Figure 2: Liver glucose production requires bioavailable riboflavin.**

(a) Liver FAD and glucose levels across light/dark cycles (Zeitgeber Time, ZT) in male mice. (b) Overnight fasting blood glucose levels after one month of B2D or Ctrl (left) and blood glucose excursion during pyruvate tolerance tests (middle) (n=5 per group). Basal (18 h fasted) hepatic glucose production (right; n=5 B2D or n=7 Ctrl). (c) RNA-seq coupled with Panther Gene Ontology analysis identified pathways altered by B2D in the liver (n=5 independent animals/diet). (d) Volcano plot depicting expression levels of flavoprotein genes after Ctrl or B2D. (e) Lipidomic analysis of Ctrl and B2D (n=5 per group). This analysis identified triglycerides significantly (p<0.05) increased in B2D versus Ctrl fed mice. Representative Oil-Red-O stained liver sections from B2D or Ctrl. Scale bar 50µm. (f) Overlap of B2D-enriched nodes with nodes enriched in the human NAFLD gene expression consensome. The human NAFLD gene expression consensome ranks 18,162 genes based on their discovery across publicly archived clinical NAFLD case/control transcriptomic datasets. Statistical significance (\*p<0.05) calculated by Mann-Whitney (b, left/right) or 2-way ANOVA with Sidak multiple comparison test (b, middle). Data are represented as mean +/- SEM.

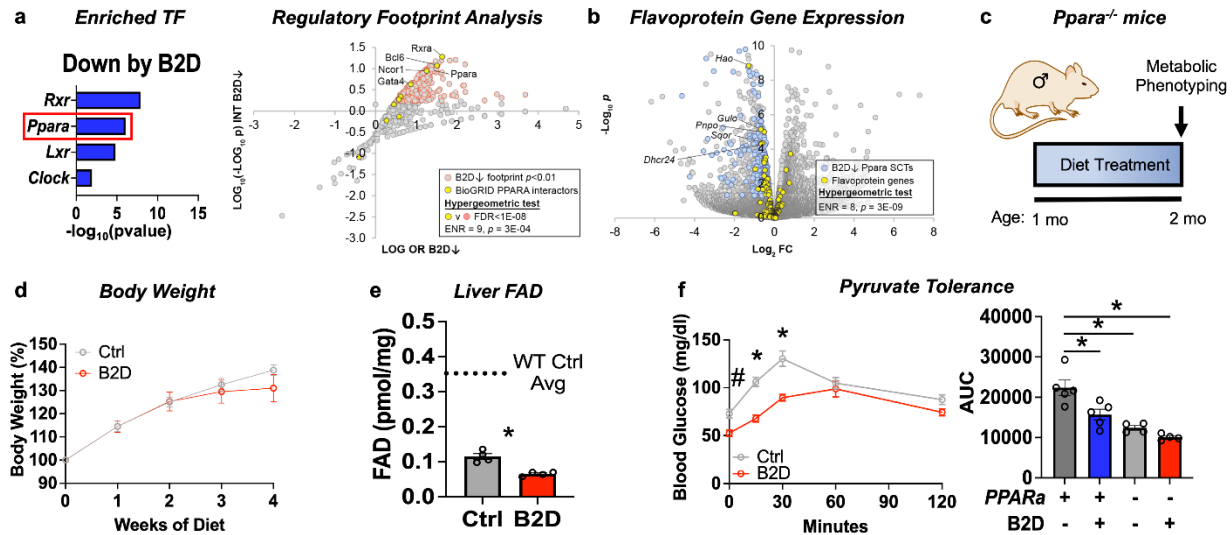

868

869 **Figure 3: PPAR $\alpha$  governs glucogenic responses to dietary riboflavin.**

870 (a) Top enriched, B2D repressed gene sets using the EnrichR transcription factor collection (left).  
 871 Scatterplot showing enrichment of known BioGRID-curated PPAR $\alpha$  interacting nodes among  
 872 nodes with the most significant intersections with B2D-repressed genes (right). (b) Volcano plot  
 873 depicting expression levels of PPAR $\alpha$ -regulated flavoprotein genes after Ctrl or B2D. (c) One-  
 874 month old *Ppara*<sup>-/-</sup> male mice (n=4 per group) were exposed to 99% B2D or isocaloric control diet  
 875 (Ctrl) for one month. (d) Body weight (% initial) changes and (e) FAD concentrations in the fasted  
 876 liver. FAD levels for WT Ctrl diet are shown with dashed lines. (f) Blood glucose levels and area  
 877 under the curve (AUC) during pyruvate tolerance tests (n=4-5/group). Statistics: Mann-Whitney  
 878 test (e), 2-way ANOVA with Sidak multiple comparison test (f, left) and one-way ANOVA with  
 879 Tukey's multiple comparisons test were used to identify statistically different AUC (f, right). Data  
 880 are represented as mean +/- SEM. \* $p < 0.05$ , # $p < 0.10$ .

881

882

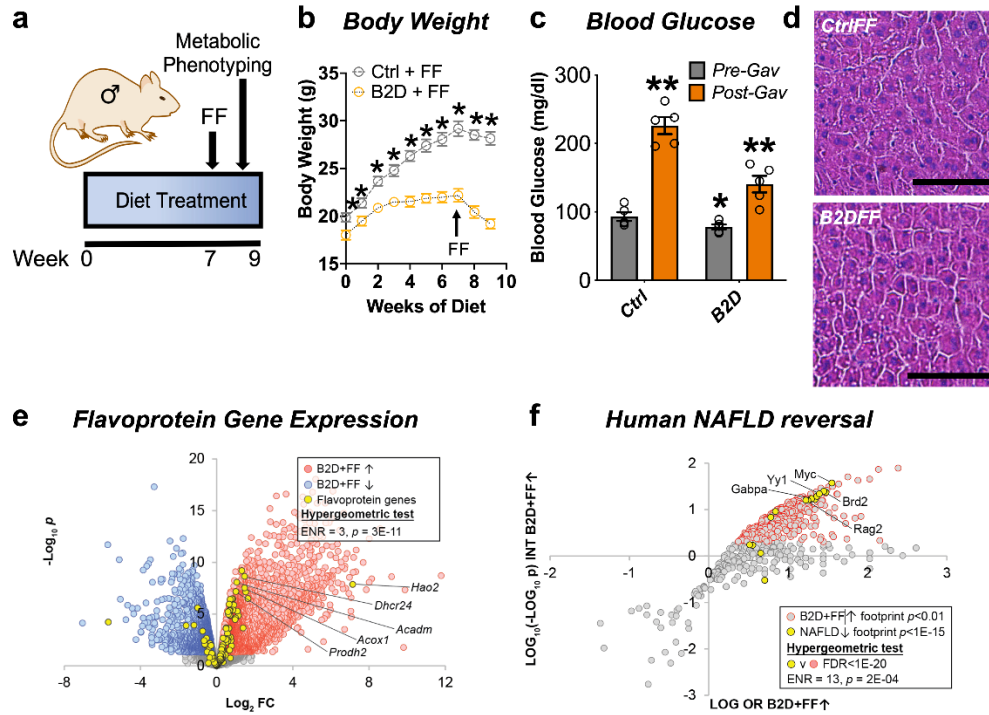

883

884 **Figure 4: Remnant PPAR $\alpha$  activation rescues fasting responses impaired by B2D.**

885 (a) One-month old male mice (n=5 per group) were exposed to 99% B2D or isocaloric control diet  
 886 (Ctrl) for 9 weeks. For weeks 7-9, mice were gavaged daily with fenofibrate (FF). (b) Body weight  
 887 (g) changes pre-gavage and during gavage. For post-gavage (week 9), mice were fasted overnight  
 888 and administered FF 2 h before measurements. (c) Overnight fasting blood glucose levels for pre-  
 889 gavage (grey) and after 2 weeks of FF treatment (orange). (d) Representative H&E-stained liver  
 890 sections from Ctrl or B2D mice following FF treatment. Scale, 100  $\mu$ m. (e) Expression level of  
 891 flavoprotein genes in B2D-fed mice following FF. (f) Enrichment of B2D+FF with gene footprints  
 892 repressed in human NAFLD. Statistics by two-way ANOVA corrected for multiple comparisons  
 893 by Tukey (b); Mann-Whitney (c), Statistical enrichment shown by hypergeometric test (e, f). Data  
 894 are represented as mean +/- SEM. \*p<0.05.

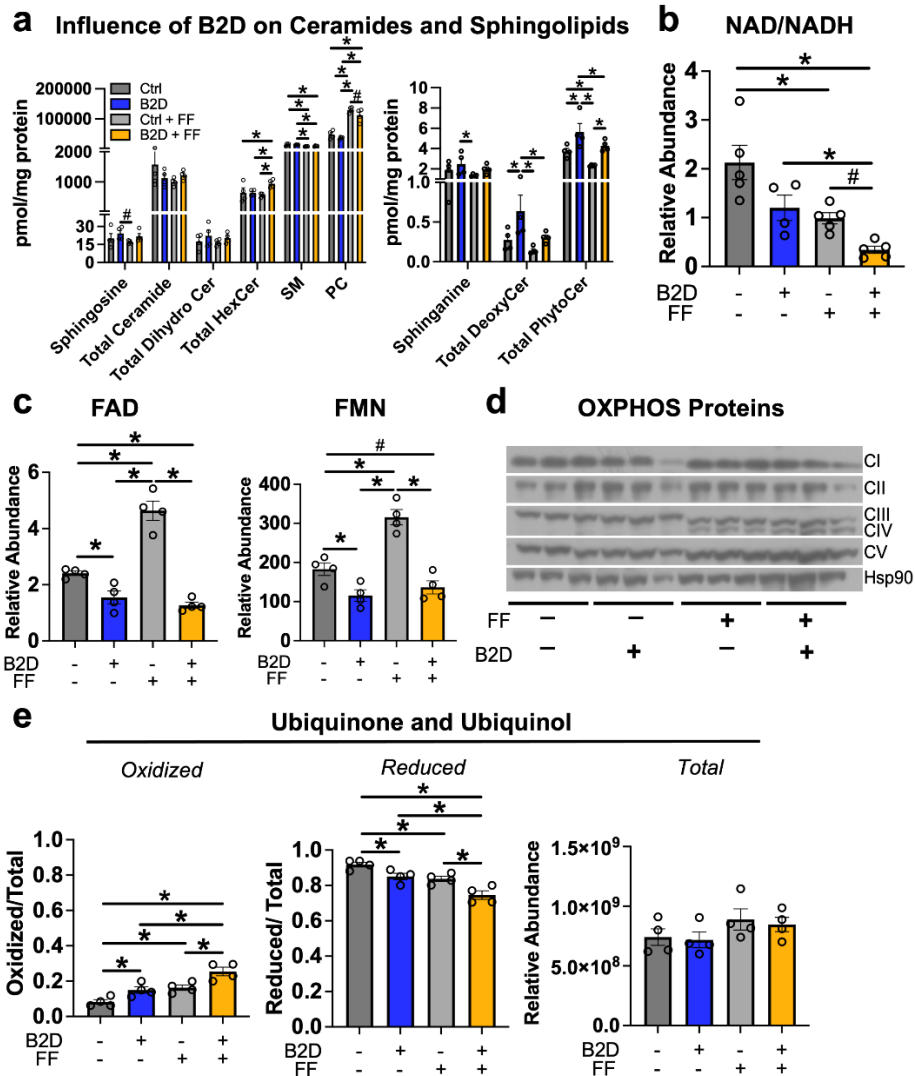

895

896 **Figure 5: Fenofibrate impacts mitochondrial respiratory chain efficiency but does not rescue**  
 897 **FAD levels in B2D.**

898 (a) Fasting liver ceramide and ceramide metabolites (pmol/mg protein) by mass spectrometry (n=4  
 899 per group). (b) Hepatic NAD/NADH ratio. (c) Fasting liver FAD and FMN relative abundance by  
 900 mass spectrometry (n=4 per group). (d) Western blot analysis of oxidative phosphorylation  
 901 complexes. Hsp90 served as the invariant control. (e) Ratio of oxidized and reduced liver  
 902 coenzyme Q10 and Q9 by mass spectrometry (n=4 per group). \*p<0.05, #p<0.1 by one-way  
 903 ANOVA with post-hoc testing (Fisher's LSD) (a, c, e). Kruskal-Wallis with post-hoc testing  
 904 (Dunn's Test) (b). Data are represented as mean +/- SEM.

905

906



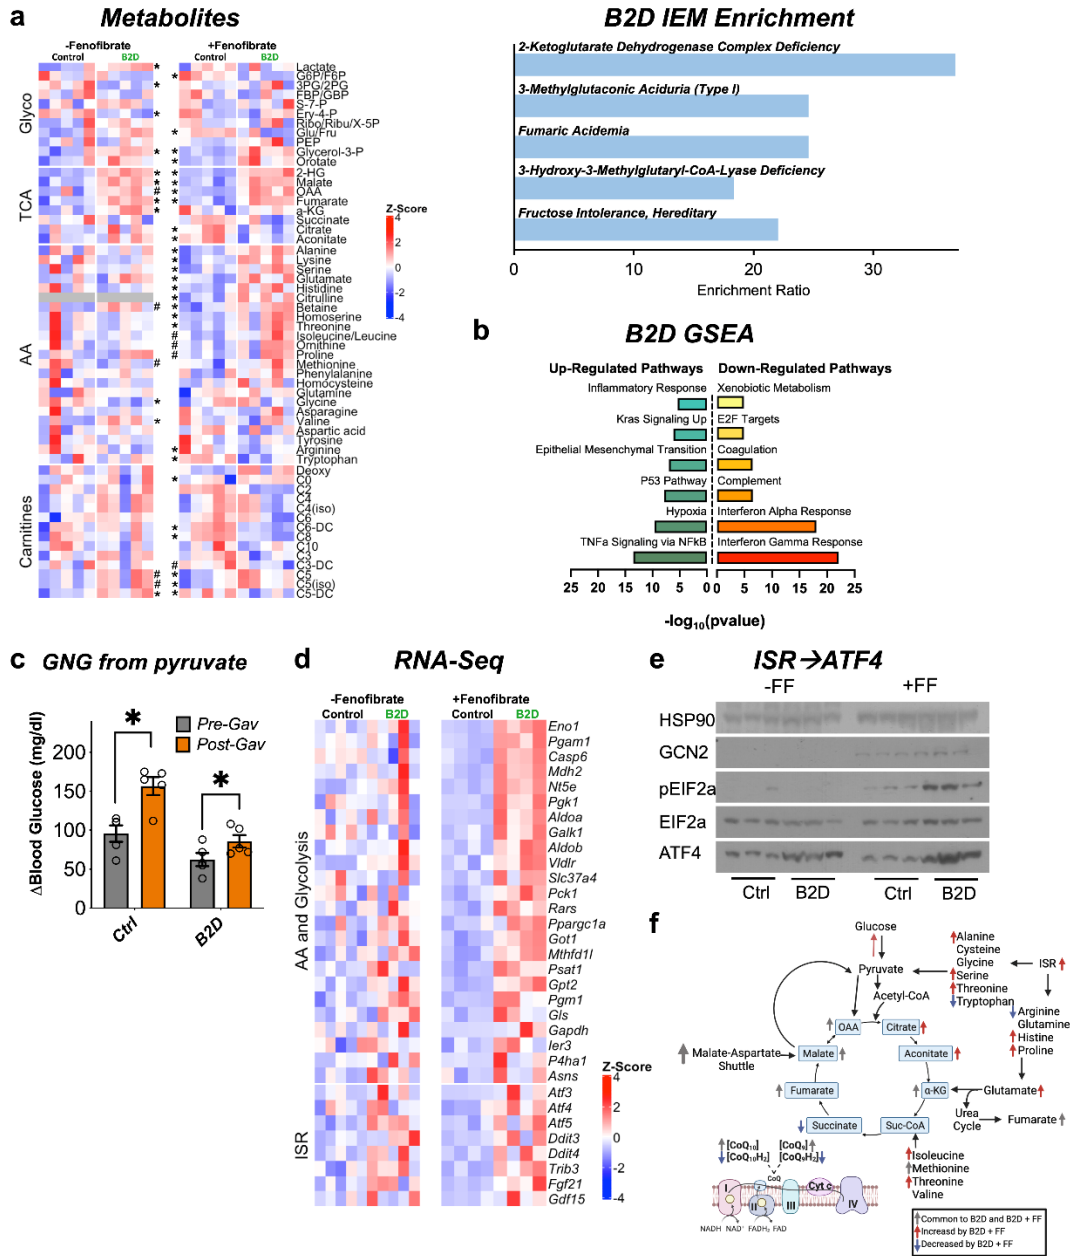

907

908 **Figure 6: ISR activity forms the basis to reconcile FAD disruption.**

909 (a) Glycolysis, TCA, amino acid, fatty acid oxidation (carnitines) metabolites measured by mass  
 910 spectrometry across B2D and FF treatments (left; shown as Z-score). Metaboanalyst integration  
 911 demonstrates B2D causes organic acidemias (top right). (b) RNA-seq coupled with gene set  
 912 enrichment analysis identified gene signatures altered by B2D in the liver (n=5 independent  
 913 animals/diet). (c) Change in glucose levels 30 minutes after pyruvate injection pre- and post-  
 914 fenofibrate gavage (n=5). (d) Amino acid, glucose metabolism, and integrated stress response  
 915 (ISR) genes in B2D or B2D + FF, shown as Z-score from RNA-seq data. (e) Western blot analysis  
 916 for ISR proteins in liver lysates from mice treated with B2D or B2D+FF and fasted overnight. (f)  
 917 B2D + FF activates the ISR, increasing amino acids that restore glucose availability. Statistics by

918 two-way ANOVA and post-hoc tests (Fisher LSD) (c); Mann-Whitney (a, d). Data are represented  
919 as mean +/- SEM. \*p<0.05, #p<0.10.  
920

## 921 Supplemental Materials

## 922 Supplemental Figure

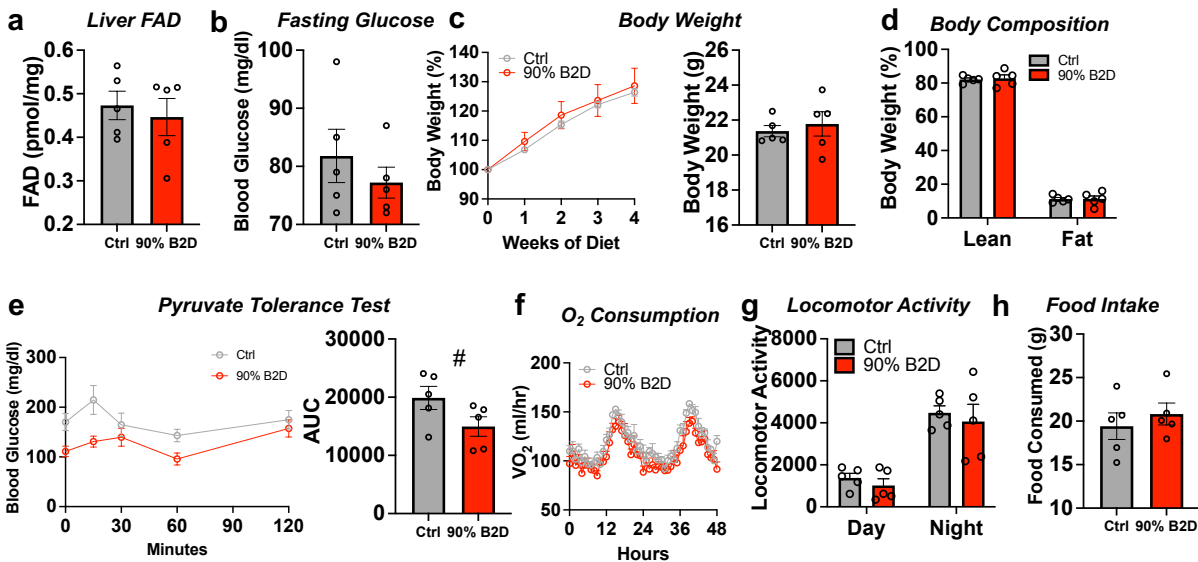

923

## 924 Supplemental Figure S1, Related to Figure 1. Metabolic effects of 90% riboflavin

925 deficiency in mice.

926 **(a)** FAD concentrations in the fasted liver. **(b)** Overnight fasting blood glucose levels after one  
927 month on 90% B2D or Ctrl. **(c)** Body weight changes and **(d)** body composition (as % of body  
928 mass). **(e)** Blood glucose excursion in 90% B2D or Ctrl mice during pyruvate tolerance tests (n=5).  
929 Statistical significance for AUC by Mann-Whitney test, #p<0.10. **(f)** Mice were individually  
930 housed and monitored in CLAMS home cages. Recorded traces of oxygen consumption (VO<sub>2</sub>,  
931 ml/hl). **(g)** Locomotor activity and **(h)** cumulative food intake (g) during time in metabolic cages.  
932 Data represented as mean +/- SEM.

933

934

935 **Supplemental Tables**

936 **Supplemental Table S1. Macronutrient compositions of 90% B2D used in the study.**

|                                            | <b>90% Ctrl</b>     | <b>90% Deficient</b>                  |
|--------------------------------------------|---------------------|---------------------------------------|
| Research Diets Name                        | AIN-93G Diet        | AIN-93G Diet With No Added Riboflavin |
| Research Diets Number                      | D10012G             | D12030102                             |
| <b>Riboflavin Concentration</b>            | <b>0.00698 g/kg</b> | <b>0.00098 g/kg</b>                   |
| <b>Formula</b>                             | <b>g/kg</b>         | <b>g/kg</b>                           |
| Casein (0.00049g/kg riboflavin)            | 200                 | 200                                   |
| L-Cystine                                  | 3                   | 3                                     |
| Sucrose                                    | 100                 | 100                                   |
| Corn Starch                                | 397.486             | 397.486                               |
| Maltodextrin 10                            | 132                 | 132                                   |
| Cellulose                                  | 50                  | 50                                    |
| Soybean Oil                                | 70                  | 70                                    |
| t-butylhydroquinone                        | 0.014               | 0.014                                 |
| Choline Bitartrate                         | 2.5                 | 2.5                                   |
| Mineral Mix S10022G                        | 35                  | 35                                    |
| Vitamin Mix V10037 (0.006 g/kg Riboflavin) | 10                  | 0                                     |
| Vitamin Mix V15920, No Added Riboflavin    | 0                   | 10                                    |
| <b>% kcal from</b>                         |                     |                                       |
| Protein                                    | 20.3                | 20.3                                  |
| Carbohydrates                              | 63.9                | 63.9                                  |
| Fat                                        | 7                   | 7                                     |
| Kcal/g                                     | 4                   | 4                                     |

937

938

939 **Supplemental Table S2. Macronutrient compositions of 99%B2D used in the study.**

|                                            | <b>99% Ctrl</b>                             | <b>99% Deficient (B2D)</b>                                          |
|--------------------------------------------|---------------------------------------------|---------------------------------------------------------------------|
| Research Diets Name                        | Modified AIN-93G Diet<br>With L-Amino Acids | Modified AIN-93G Diet With L-Amino<br>Acids and No Added Riboflavin |
| Research Diets Number                      | A18041301                                   | A19080901                                                           |
| <b>Riboflavin Concentration</b>            | <b>0.006 g/kg</b>                           | <b>0 g/kg</b>                                                       |
| <b>Formula</b>                             | <b>g/kg</b>                                 | <b>g/kg</b>                                                         |
| L-Alanine                                  | 5                                           | 5                                                                   |
| L-Arginine                                 | 5.9                                         | 5.9                                                                 |
| L-Asparagine, monohydrate                  | 7                                           | 7                                                                   |
| L-Aspartic Acid                            | 5                                           | 5                                                                   |
| L-Cysteine                                 | 4.2                                         | 4.2                                                                 |
| L-Glutamic Acid                            | 20.7                                        | 20.7                                                                |
| L-Glutamine                                | 17.1                                        | 17.1                                                                |
| Glycine                                    | 3                                           | 3                                                                   |
| L-Histidine-HCl, monohydrate               | 4.5                                         | 4.5                                                                 |
| L-Isoleucine                               | 7.5                                         | 7.5                                                                 |
| L-Leucine                                  | 15.7                                        | 15.7                                                                |
| L-Lysine, HCl                              | 13.1                                        | 13.1                                                                |
| L-Methionine                               | 5                                           | 5                                                                   |
| L-Phenylalanine                            | 8.4                                         | 8.4                                                                 |
| L-Proline                                  | 17.6                                        | 17.6                                                                |
| L-Serine                                   | 9.9                                         | 9.9                                                                 |
| L-Threonine                                | 7.1                                         | 7.1                                                                 |
| L-Tryptophan                               | 2.1                                         | 2.1                                                                 |
| L-Tyrosine                                 | 9.1                                         | 9.1                                                                 |
| L-Valine                                   | 9.2                                         | 9.2                                                                 |
| Sucrose                                    | 107.0777                                    | 107.0777                                                            |
| Corn Starch                                | 397.486                                     | 397.486                                                             |
| Maltodextrin 10                            | 132                                         | 132                                                                 |
| Cellulose                                  | 50                                          | 50                                                                  |
| Soybean Oil                                | 70                                          | 70                                                                  |
| t-butylrhydroquinone                       | 0.014                                       | 0.014                                                               |
| Calcium Carbonate                          | 7.34                                        | 7.34                                                                |
| Potassium Citrate 1, monohydrate           | 2.4773                                      | 2.4773                                                              |
| Potassium Phosphate, monobasic             | 6.86                                        | 6.86                                                                |
| Calcium Phosphate, dibasic                 | 7                                           | 7                                                                   |
| Sodium Chloride                            | 2.59                                        | 2.59                                                                |
| Sodium Bicarbonate                         | 7.5                                         | 7.5                                                                 |
| Choline Bitartrate                         | 2.5                                         | 2.5                                                                 |
| Mineral Mix S10022C                        | 3.5                                         | 3.5                                                                 |
| Vitamin Mix V10037 (0.006 g/kg Riboflavin) | 10                                          | 0                                                                   |
| Vitamin Mix V15920, No added riboflavin    | 0                                           | 10                                                                  |
| <b>% kcal from</b>                         |                                             |                                                                     |
| Protein                                    | 18                                          | 18                                                                  |
| Carbohydrates                              | 65.9                                        | 65.9                                                                |
| Fat                                        | 7.1                                         | 7.1                                                                 |
| Kcal/g                                     | 3.924                                       | 3.924                                                               |

941 **Supplemental Table S3, Related to Figure 2. Serum parameters in B2D interventions.** Data  
 942 are mean  $\pm$  SEM. The number of animals in each group are indicated in parentheses. Statistical  
 943 significance (p) was determined by Mann-Whitney tests.  
 944

|           | <b>Cholesterol</b><br>(mg/dl) | <b>TGs</b><br>(mg/dl) | <b>Lactate</b><br>(mM) | <b>FFA</b><br>( $\mu$ M) | <b>b-HB</b><br>(mM) | <b>Glycerol</b><br>( $\mu$ M) |
|-----------|-------------------------------|-----------------------|------------------------|--------------------------|---------------------|-------------------------------|
| 90% Ctrl  | 122.1 $\pm$ 6.4 (5)           | 152.4 $\pm$ 17.8 (5)  | 5.2 $\pm$ 0.3 (5)      |                          |                     |                               |
| 90% B2D   | 120.0 $\pm$ 8.4 (4)           | 113.6 $\pm$ 25.5 (5)  | 3.5 $\pm$ 0.3 (5)      | NA                       | NA                  | NA                            |
| p         | 0.84                          | 0.25                  | 0.25                   |                          |                     |                               |
| 99% Ctrl  | 146.5 $\pm$ 7.2 (5)           | 100.9 $\pm$ 6.7 (5)   | 4.5 $\pm$ 0.5 (5)      | 994.1 $\pm$ 84.9 (5)     | 0.19 $\pm$ 0.02 (5) | 105.4 $\pm$ 15.4 (5)          |
| 99% B2D   | 134.3 $\pm$ 11.0 (4)          | 126.6 $\pm$ 17.7 (4)  | 6.4 $\pm$ 0.4 (4)      | 1128.5 $\pm$ 39.0 (5)    | 0.27 $\pm$ 0.03 (5) | 134.0 $\pm$ 13.3 (4)          |
| p         | 0.36                          | 0.18                  | 0.18                   | 0.15                     | 0.08                | 0.22                          |
| pKO Ctrl  | 172.8 $\pm$ 15.0 (4)          | 120.7 $\pm$ 15.5 (4)  | 2.4 $\pm$ 0.1 (4)      | 3092.9 $\pm$ 501 (4)     | 0.06 $\pm$ 0.01 (4) | 157.9 $\pm$ 10.5 (4)          |
| pKO B2D   | 142.9 $\pm$ 10.7 (4)          | 212.9 $\pm$ 31.8 (4)  | 1.9 $\pm$ 0.1 (4)      | 2660.9 $\pm$ 144 (4)     | 0.08 $\pm$ 0.04 (4) | 131.1 $\pm$ 8.4 (3)           |
| p         | 0.16                          | <b>0.04</b>           | <b>0.04</b>            | 1.00                     | 0.52                | 0.12                          |
| Ctrl + FF | 181.6 $\pm$ 16.5 (5)          | 40.7 $\pm$ 3.9 (5)    | 3.3 $\pm$ 0.5 (5)      | 1136.3 $\pm$ 120 (5)     | 0.22 $\pm$ 0.02 (5) | 99.3 $\pm$ 10.4 (5)           |
| B2D + FF  | 194.1 $\pm$ 26.7 (5)          | 39.4 $\pm$ 3.8 (5)    | 3.7 $\pm$ 0.5 (4)      | 1142.6 $\pm$ 118 (5)     | 0.13 $\pm$ 0.03 (5) | 76.6 $\pm$ 10.6 (5)           |
| p         | 0.70                          | 0.82                  | 0.82                   | 0.84                     | <b>0.04</b>         | 0.16                          |

945

946 **Supplemental Table S4, Related to Figure 4. Liver triglycerides and cholesterol in B2D**  
947 **interventions.** Data are mean  $\pm$  SEM. The number of animals in each group are indicated in  
948 parentheses. Statistical significance (p) was determined Mann-Whitney tests.  
949

|           | <u>TGs (mg/g)</u>    |             | <u>Cholesterol (mg/g)</u> |             |
|-----------|----------------------|-------------|---------------------------|-------------|
|           |                      | <b>p</b>    |                           | <b>p</b>    |
| 99% Ctrl  | 22.4 $\pm$ 2.1 (4)   | <b>0.05</b> | 1.1 $\pm$ 0.2 (4)         | 0.26        |
| 99% B2D   | 32.08 $\pm$ 3.45 (3) |             | 0.8 $\pm$ 0.1 (4)         |             |
| Ctrl + FF | 8.3 $\pm$ 1.4 (4)    | 0.24        | 0.7 $\pm$ 0.1 (4)         | <b>0.02</b> |
| B2D + FF  | 11.8 $\pm$ 2.3 (4)   |             | 0.2 $\pm$ 0.1 (4)         |             |

950 **Supplemental Table S5: Antibodies used in this study**

| <b>Antibody</b>                 | <b>Company</b>     | <b>Catalog Number</b> | <b>RRID</b> |
|---------------------------------|--------------------|-----------------------|-------------|
| Hsp90                           | Cell Signaling     | C45G5                 | AB_2233307  |
| Gcn2                            | Cell Signaling     | 3302                  | AB_2277617  |
| p-Eif2a                         | Cell Signaling     | 9721                  | AB_330951   |
| Eif2a                           | Santa Cruz Biotech | Sc133132              | AB_1562699  |
| Atf4                            | Cell Signaling     | 11815                 | AB_2616025  |
| Total OXPHOS<br>Rodent Cocktail | Abcam              | Ab110413              | AB_2629281  |
| Rabbit HRP                      | Cell Signaling     | 7074S                 | AB_2099233  |
| Mouse HRP                       | Cell Signaling     | 7076P2                | AB_330924   |

951

952

953
